1 **A novel sialylation site on *Neisseria gonorrhoeae* lipooligosaccharide links**  
2 **heptose II lactose expression with pathogenicity**

3

4 Sanjay Ram,<sup>1#</sup> Sunita Gulati,<sup>1</sup> Lisa A. Lewis,<sup>1</sup> Srinjoy Chakraborti,<sup>1</sup> Bo Zheng,<sup>1</sup> Rosane  
5 B. DeOliveira,<sup>1</sup> George W. Reed,<sup>2</sup> Andrew D. Cox,<sup>3</sup> Jianjun Li,<sup>3</sup> Frank St. Michael,<sup>3</sup>  
6 Jacek Stupak,<sup>3</sup> Xia-Hong Su,<sup>4</sup> Sudeshna Saha,<sup>5</sup> Corinna S. Landig,<sup>5</sup> Ajit Varki<sup>5</sup> and  
7 Peter A. Rice<sup>1</sup>

8

9 <sup>1</sup>Division of Infectious Diseases and Immunology and <sup>2</sup>Preventive and Behavioral  
10 Medicine, University of Massachusetts Medical School, Worcester MA 01605, USA,

11 <sup>3</sup>Human Health Therapeutics Portfolio, National Research Council of Canada, Ottawa,

12 Ontario, K1A 0R6, Canada, <sup>4</sup>Department of STD, Institute of Dermatology, Chinese

13 Academy of Medical Sciences and Peking Union Medical College, Nanjing, P. R. China

14 and <sup>5</sup>Departments of Medicine and Cellular and Molecular Medicine, Glycobiology

15 Research and Training Center, University of California, San Diego, La Jolla, CA 92063,

16 USA.

17 **Running title:** HepII lactose sialylation in gonococcal pathogenicity

18 **#Corresponding author:** Sanjay Ram, Division of Infectious Diseases and Immunology,

19 University of Massachusetts Medical School, Lazare Research Building, Room 322, 364

20 Plantation Street, Worcester MA 01605, USA. Tel: +1-508-856-6269. Fax: +1-508-856-

21 8447. E-mail: [sanjay.ram@umassmed.edu](mailto:sanjay.ram@umassmed.edu)

## 22 **Abstract**

23           Sialylation of lacto-*N*-neotetraose (LNnT) extending from heptose I (HepI) of  
24 gonococcal lipooligosaccharide (LOS) contributes to pathogenesis. Previously,  
25 gonococcal LOS sialyltransferase (Lst) was shown to sialylate LOS in Triton X-100  
26 extracts of strain 15253, which expresses lactose from both HepI and HepII, the minimal  
27 structure required for mAb 2C7 binding. Ongoing work has shown that growth of 15253  
28 in cytidine monophospho-*N*-acetylneuraminic acid (CMP-Neu5Ac)-containing media  
29 enables binding to CD33/Siglec-3, a cell surface receptor that binds sialic acid,  
30 suggesting that lactose termini on LOS of intact gonococci can be sialylated. Neu5Ac  
31 was detected on LOSs of strains 15253 and a MS11 mutant with only lactose from HepI  
32 and HepII by mass spectrometry; deleting HepII lactose rendered Neu5Ac undetectable.  
33 Resistance of HepII lactose Neu5Ac to desialylation by  $\alpha$ 2-3-specific neuraminidase  
34 suggested an  $\alpha$ 2-6-linkage. Although not associated with increased factor H binding,  
35 HepII lactose sialylation inhibited complement C3 deposition on gonococci. 15253  
36 mutants that lacked Lst or HepII lactose were significantly attenuated in mice,  
37 confirming the importance of HepII Neu5Ac in virulence. All 75 minimally passaged  
38 clinical isolates from Nanjing, China, expressed HepII lactose, evidenced by reactivity  
39 with mAb 2C7; mAb 2C7 was bactericidal against the first 62 (of 75) isolates that had  
40 been collected sequentially and were sialylated before testing. mAb 2C7 effectively  
41 attenuated 15253 vaginal colonization in mice. In conclusion, this novel sialylation site  
42 could explain the ubiquity of gonococcal HepII lactose *in vivo*. Our findings reiterate the  
43 candidacy of the 2C7 epitope as a vaccine antigen and mAb 2C7 as an  
44 immunotherapeutic antibody.

## 45 **Introduction**

46 Gonorrhea affects about 78 million people annually worldwide (1); almost  
47 470,000 of these are reported in the U.S. Multidrug-resistant gonorrhea has been  
48 reported on every continent and is a serious public health concern (2-6). Understanding  
49 how gonococci evade host immune defenses is an important step toward development  
50 of urgently needed safe and effective vaccines and novel therapeutics against this  
51 infection.

52 *N. gonorrhoeae* is a uniquely human-adapted pathogen (7). On a molar basis,  
53 lipooligosaccharide (LOS) is the most abundant gonococcal outer membrane molecule  
54 and plays a key role in many facets of pathogenesis (8-19). Host-like glycans  
55 expressed by lipooligosaccharide (LOS) of *N. gonorrhoeae* constitutes an example of  
56 molecular mimicry (8, 20). Two structures expressed by Neisserial LOS from heptose  
57 (Hep) I that mimic host glycans include lacto-*N*-neotetraose (LNnT; Gal $\beta$ 1-4GlcNAc $\beta$ 1-  
58 3Gal $\beta$ 1-4Glc $\beta$ 1-), identical to the terminal tetrasaccharide of paragloboside, a precursor  
59 of the major human blood group antigens (21), and globotriose (Gal $\alpha$ 1-4Gal $\beta$ 1-4Glc $\beta$ 1-)  
60 that is identical to terminal globotriose trisaccharide of the P<sup>K</sup>-like blood group antigen  
61 (22). The seminal work of Harry Smith and colleagues showed that *N. gonorrhoeae*  
62 scavenge cytidine monophospho-*N*-acetylneuraminic acid (CMP-Neu5Ac) from its host  
63 to sialylate its LOS (23, 24). Both, LNnT and P<sup>K</sup>-like LOSs can be sialylated (25, 26).  
64 LOS sialylation inhibits complement activation and converts strains that are otherwise  
65 sensitive to killing by complement in serum to a 'serum (or complement)-resistant'  
66 phenotype (16, 27-29). Several other microbes also use sialic acid expression to their

67 advantage to subvert host immunity (30-41), by mimicking host sialic acid-based “self-  
68 associated molecular patterns”

69         Among members of the species *Neisseria*, the gonococcus uniquely expresses  
70 lactose extending from HepII. A monoclonal antibody (mAb) called 2C7 binds an  
71 epitope on LOS that requires expression of HepI and HepII lactose. Despite being under  
72 control of a phase variable LOS glycosyltransferase (*lgt*) gene called *lgtG*, HepII lactose  
73 is expressed by ~95% of clinical isolates of *N. gonorrhoeae* (42), which suggests a key  
74 role in virulence. Isogenic mutant strains that lack *lgtG* show decreased virulence in the  
75 mouse vaginal colonization model of gonorrhea (43). Why HepII lactose promotes  
76 gonococcal virulence remains unclear. In recent work, we noted that growth of a  
77 gonococcal strain called 15253 that expresses lactose simultaneously from HepI and  
78 HepII (44) was capable of binding to Siglec-3 when grown in CMP-Neu5Ac-containing  
79 media (45). Siglec-3 binds exclusively to sialyoglycans (46, 47). These data suggested  
80 that lactose expressed by *N. gonorrhoeae* LOS could also be sialylated. This study  
81 describes sialylation of gonococcal LOS lactose termini and elucidates its function in  
82 complement evasion and virulence.

83

84

## 85 Results

86 **Neu5Ac 'caps' *N. gonorrhoeae* HepII lactose.** LOS glycan extensions from  
87 HepI and HepII for the strains used in this study are shown in Fig. 1. The ability of  
88 strains 15253 and MS11 2-Hex/G+, which express lactose extending from HepI and  
89 HepII, and their respective isogenic mutants, 15253/G- and MS11 2-Hex/G-, which  
90 express only lactose only from HepI, to add Neu5Ac to LOS was determined by SDS-  
91 PAGE. MS11 4-Hex/G- (expresses LNnT LOS from HepI) was used as a positive  
92 control for sialylation. An *lst* deletion mutant of 15253 (15253  $\Delta$ /*lst*) that lacks the ability  
93 to sialylate its LOS was also tested to address whether the previously described Lst  
94 enzyme is also responsible for sialylation of lactose.

95 Bacteria were grown in media alone, or media supplemented with 100  $\mu$ g/ml  
96 CMP-Neu5Ac for maximal LOS sialylation. As shown in Fig. 2, the upper band in the '+'  
97 lane of 2-Hex/G+ shows slower mobility compared to the upper band in the  
98 corresponding '-' lane. Note that despite fixing *igtG* 'on', MS11 2-Hex/G+ expresses an  
99 LOS species with only HepI lactose (i.e., the LOS expressed by MS11 2-Hex/G-). This  
100 is because of export of LOS to the outer membrane prior to addition of the proximal Glc  
101 on HepII, as noted previously (48). Similarly, retarded mobility of 15253 LOS was also  
102 observed when grown in media containing CMP-Neu5Ac. The LOS of 4-Hex/G-  
103 (positive control for sialylation) incorporated Neu5Ac and migrated slower. There was  
104 no appreciable alteration in LOS migration when 2-Hex/G-, 15253/G- or 15253  $\Delta$ /*lst*  
105 were grown in CMP-Neu5Ac, suggesting that Neu5Ac was added to the terminal Gal of  
106 HepII lactose and that Lst was the enzyme responsible for sialylation.

107 Mass spectroscopic analysis of LOS purified from strains 15253, 15253/G-,  
108 MS11 2-Hex/G+ and MS11 2-Hex/G- grown in CMP-Neu5Ac and unsialylated 15253  
109 (negative control) is shown in Supplemental Table S1. The data confirm the presence of  
110 sialic acid on 15253 and MS11 2-Hex/G+, but not on their isogenic mutants lacking  
111 HepII lactose. Collectively, the data strongly suggest that Neu5Ac is added to HepII  
112 lactose.

113

114 **Sialylation of HepII lactose does not enhance FH binding.** Previously, we  
115 showed that sialylation of *N. gonorrhoeae* LNnT LOS, but not P<sup>K</sup>-like LOS, enhances  
116 human FH binding (26). We used strain MS11 to determine whether sialylation of HepII  
117 lactose enhances FH binding because this strain expresses PorB.1B and binds FH  
118 relatively weakly in the unsialylated state (49), which would more readily reveal  
119 increased FH binding with sialylation, if it were to occur. By contrast, strain 15253  
120 (PorB.1A) binds high levels of FH even when unsialylated (49), which would limit the  
121 ability to detect an increase in FH binding with sialylation. FH binding to MS11 LOS  
122 mutants that expressed 2, 3 or 4 hexoses from HepI, each with (G+) or without (G-)  
123 HepII lactose was examined. The 3-Hex (P<sup>K</sup>-like LOS) and 4-Hex (LNnT) mutants  
124 served as negative and positive controls for FH binding with sialylation, respectively. As  
125 shown in Fig. 3, growth of the 2-Hex mutants in CMP-Neu5Ac did not enhance FH  
126 binding. Thus, enhanced FH binding to *N. gonorrhoeae* is restricted to LNnT LOS.

127

128 **HepII lactose sialylation regulate complement activation.** Neu5Ac capping of  
129 gonococcal LNnT and P<sup>K</sup>-like LOS both inhibit complement. *N. gonorrhoeae* bind C4BP

130 and FH in a human-specific manner (50, 51). Initial attempts at measuring human C3  
131 fragment deposition by flow cytometry on the two unsialylated strains using normal  
132 human serum revealed levels too low to discern the effects of sialylation on C3  
133 deposition. Therefore, we used mouse complement, whose C4BP and FH do not bind  
134 *N. gonorrhoeae*, to study the effects of LOS sialylation on C3 deposition. Consistent  
135 with the addition of Neu5Ac to HepII lactose, C3 deposition decreased only on wild-type  
136 15253 grown in media containing CMP-Neu5Ac (Fig. 4). Neither 15253/G- nor 15253  
137  $\Delta/st$  inhibited C3 deposition when grown in CMP-Neu5Ac, consistent with the inability of  
138 these two mutant strains to sialylate their LOSs.

139 We next examined the effects of sialylation on complement activation on six  
140 MS11 LOS mutants (Fig. 5). The sialylatable 3-Hex and 4-Hex strains served as  
141 controls for Neu5Ac-mediated complement inhibition. Growth in media containing CMP-  
142 Neu5Ac decreased C3 deposition all tested strains. Similar to 15253, sialylation of  
143 MS11 2-Hex/G+ also inhibited C3 deposition. In contrast to 15253/G-, we noted a  
144 reproducible decrease in C3 deposition on the 2-Hex/G- mutant, suggesting that  
145 Neu5Ac was also added to the LOS of this strain. The degree of inhibition seen with  
146 sialylation of MS11 2-Hex/G- (a 4.1-fold decrease compared to the unsialylated parent,  
147 and 7.3-fold above baseline conjugate control levels) was less than that seen with  
148 complement inhibition upon sialylation of MS11 2-Hex/G+ (a 21-fold decrease  
149 compared to unsialylated 2-Hex/G+, and only 3-fold greater fluorescence compared to  
150 the baseline conjugate control). This amount of LOS sialylation of MS11 2-Hex/G- LOS,  
151 although functional, was too small to be appreciated by changes in mobility on a Tricine  
152 gel or by MS analysis.

153 To discern the sialic acid linkage to HepII substituted lactose we examined the  
154 effect of  $\alpha$ 2-3-linkage-specific neuraminidase on mouse C3 deposition (Fig. 6).  
155 Sialylated 2-Hex/G+ and the corresponding wild-type strain 15253 that possessed the  
156 same pattern of Hep I and Hep II hexose substitutions, failed to show increased C3  
157 deposition after treatment with recombinant  $\alpha$ 2-3-specific sialidase followed by  
158 incubation with 15% normal mouse serum; resistance to  $\alpha$ 2-3-sialidase suggests an  $\alpha$ 2-  
159 6 linkage.

160

161 **Loss of sialic acid on HepII lactose impairs *N. gonorrhoeae* vaginal**  
162 **colonization in mice.** The ability of 15253 (wild-type), 15253/G- and 15253  $\Delta$ lst to  
163 colonize the genital tract of *Cmah* knockout (KO) mice was compared. *Cmah* KO mice  
164 lack the enzyme CMP-*N*-acetylneuraminic acid hydroxylase (CMAH) and akin to  
165 humans, cannot convert Neu5Ac to Neu5Gc. Thus, these mice provide a 'human-like'  
166 sialic acid milieu to study the effects of LOS sialylation on virulence. *Cmah* KO mice  
167 support *N. gonorrhoeae* colonization slightly better than control wild-type BALB/c mice  
168 (52). Loss of either HepII lactose or Lst significantly attenuated the duration and burden  
169 of bacterial colonization (Fig. 7A-C). These data provide strong evidence for the  
170 importance of sialylation of HepII lactose in gonococcal virulence. We were unable to  
171 evaluate the effects of LOS sialylation in MS11 2-Hex/G+ because this strain colonized  
172 mice for only 3 days (data not shown).

173

174 **Effect of sialylation on mAb 2C7 binding and efficacy.** mAb 2C7 targets a  
175 LOS epitope being developed as a gonococcal vaccine candidate. The minimal LOS



176 structure required for mAb 2C7 binding are lactoses simultaneously extending from both  
177 HepI and HepII. Glycan extensions beyond lactose on HepII, for example with GalNAc-  
178 Gal seen in a mutant strain selected under pyocin pressure called JW31R, abrogates  
179 mAb 2C7 binding (53). We therefore asked whether sialylation of HepII lactose affected  
180 mAb 2C7 binding and function. While sialylation of 15253 did not affect mAb 2C7  
181 binding (Fig. 8A, left graph), sialylation of MS11 2-Hex/G+ resulted in a reproducible ~2-  
182 to 3-fold reduction in mAb 2C7 binding (Fig. 8A, right graph). Similar binding of mAb  
183 2C7 to sialylated and unsialylated 15253 allowed us to assess the functional effects of  
184 HepII lactose sialylation when antibody binding was kept constant. As shown in Fig. 8B,  
185 increasing amounts of CMP-Neu5Ac in media caused a dose-dependent decrease in  
186 killing by mAb 2C7.

187

188 **mAb 2C7 is active against strain 15253 in vivo.** In light of prior work that  
189 showed the importance of LOS sialylation for infection of mice (54, 55) and the  
190 observed resistance of sialylated 15253 to mAb 2C7 *in vitro* (Fig. 8), we examined the  
191 efficacy of mAb 2C7 versus 15253 in the BALB/c mouse vaginal colonization model. A  
192 'passive immunization model' to address the efficacy of mAb 2C7 to simulate effects of  
193 vaccine antibody was used (43). Wild-type BALB/c mice (n=8) were administered mAb  
194 2C7 10 µg intraperitoneally on Days -2, -1 and 0, and CFUs were monitored daily. The  
195 control group (n=7) received mouse IgG3. mAb 2C7 significantly shortened the duration  
196 and burden of infection with 15253 (Fig. 9A-C).

197

198           **Expression of the 2C7 epitope by contemporary clinical isolates of *N.***  
199 ***gonorrhoeae***. Despite being under control of a phase variable gene, *lgtG*, the 2C7 LOS  
200 epitope (Fig. 10A) was expressed by 94% of gonococci recovered directly from cervical  
201 secretions from a cohort of women who attended a sexually transmitted disease (STD)  
202 clinic in Boston (42). We examined a collection of minimally ( $\leq 3$ ) passaged isolates  
203 cultured from the female contacts of men with gonorrhea who were referred to a STD  
204 clinic in Nanjing, China, for expression of the 2C7 LOS epitope by whole cell ELISA. We  
205 also examined isolates for their ability to bind to mAb L8 (recognizes an epitope defined  
206 by HepI lactose and phosphoethanolamine [PEA] substitution at the 3-position on HepII;  
207 expression of HepII lactose abrogates mAb L8 binding) and mAb 3F11 (recognizes  
208 terminal [unsialylated] lactosamine of LNnT) (Fig. 10A). As shown in Fig. 10B, each of  
209 75 isolates bound to mAb 2C7, albeit to varying degrees, as did mAb L8 and 3F11. mAb  
210 L1 barely bound to any of the tested isolates.

211           We next assessed the ability of mAb 2C7 to mediate complement-dependent  
212 bactericidal activity against the first 62 of 75 isolates collected from men with urethritis in  
213 a Nanjing (China) study of gonococcal transmission from men to women. Because  
214 some of the strains were sensitive to killing by 16.7% pooled normal human serum  
215 (NHS) that was used as the complement source, all isolates were grown in media  
216 containing 2  $\mu\text{g/ml}$  CMP-Neu5Ac to render them fully serum resistant ( $>100\%$  survival).  
217 All (100%) of isolates were killed  $>50\%$  in the presence of 5  $\mu\text{g/ml}$  of mAb 2C7 and  
218 NHS. This included two of four isolates that bound very low levels of mAb 2C7 by ELISA  
219 ( $\text{OD}_{450\text{nm}}$  between 0.065 and 0.090). Further, serum bactericidal activity correlated with  
220 levels of mAb 2C7 binding (Fig. 10C).

## 221 Discussion

222 The novel finding in this report is the presence of Neu5Ac on *N. gonorrhoeae*  
223 HepII lactose. To our knowledge, *N. gonorrhoeae* is the only member of the genus  
224 Neisseria that expresses lactose extending from HepII. Certain *N. meningitidis* strains  
225 possess *IgtG* and can substitute Glc at the 3 position of HepII (seen in LOS  
226 immunotypes L2 and L4 (56, 57)), but extensions beyond the proximal Glc in  
227 meningococci have not been described. Prior work by Mandrell et al provided evidence  
228 for the ability of 15253 Lst to sialylate lactose, although not in context of intact bacteria;  
229 LOS in Triton X-100 extracts of strain 15253 (which also contains Lst) could incorporate  
230 radiolabeled Neu5Ac when supplied with exogenous CMP-[<sup>14</sup>C]-Neu5Ac (58).

231 mAb 2C7 recognized 94% of 68 gonococci examined directly from cervical  
232 secretions express and 95% of 101 randomly chosen fresh (second passage)  
233 gonococcal isolates from a sexually transmitted disease clinic in Boston (42). We  
234 recently surveyed 75 minimally passaged gonococcal isolates from Nanjing, China and  
235 noted that 100% of isolates reacted with mAb 2C7. All strains also expressed LNnT,  
236 which suggests that both sialylatable glycans are important for gonococcal  
237 pathogenesis. The importance of LNnT sialylation, both in humans and in the mouse  
238 vaginal colonization model has been established (12, 54, 55, 59). Phase variability of  
239 *IgtA* and *IgtD* control expression of LNnT (17). *IgtA* and *IgtC* both 'off' would result in  
240 expression of lactose, while the combination of *IgtA* off and *IgtC* on would result in  
241 elaboration of the P<sup>K</sup>-like (3-Hex) structure. If *IgtA* and *IgtD* are both 'on', GalNAc is  
242 added to the terminal Gal of LNnT and prevents sialylation. Sialic acid likely plays a  
243 multifaceted role in Neisserial pathogenesis. In addition to inhibiting complement,

244 enhancing resistance to opsonophagocytosis and cationic antimicrobial peptides (60,  
245 61), Neu5Ac engages sialic acid-binding immunoglobulin-type lectins (Siglecs) many of  
246 which are, in turn, linked to an immunoreceptor tyrosine-based inhibition (ITIM) motif  
247 and inhibit the inflammatory response (62). Neu5Ac has also been identified in  
248 gonococcal biofilms (63). Because it can also sialylate HepII lactose, the gonococcus  
249 has the capacity to maintain LOS sialylation even when the previously described  
250 sialylatable LNnT or P<sup>K</sup>-like structures is not expressed from HepI. While HepII lactose  
251 can be sialylated when HepI also expresses lactose, it is unclear whether HepII lactose  
252 can be sialylated when LNnT or P<sup>K</sup> is also expressed on HepI. Gilbert and colleagues  
253 showed that meningococcal Lst could add Neu5Ac to 6(5-fluorescein-carboxamido)-  
254 hexanoic acid succinimidyl ester (FCHASE)-aminophenyl-lactose. Lst added ~6.4-fold or  
255 ~3.2-fold more Neu5Ac onto lactosamine (LNnT is lactosamine-lactose) compared to  
256 lactose at substrate concentrations of 0.2 mM or 1.0 mM, respectively (64). Based on  
257 these data, we speculate that LNnT is preferentially sialylated over lactose when both  
258 glycan species are expressed.

259         The importance of Neu5Ac on HepII lactose in pathogenesis was illustrated by  
260 attenuation of 15253  $\Delta$ lst in the mouse vaginal colonization model. Thus, unsialylated  
261 HepII lactose does not support virulence in this model. Expression of HepII lactose by  
262 almost all clinical isolates highlights the importance of maintaining *IgtG* 'on' *in vivo*. We  
263 are not aware of any naturally occurring gonococcal isolate that lacks *IgtG*. We have  
264 shown previously that a *IgtG* deletion mutant of *N. gonorrhoeae* FA1090 was less  
265 virulent than its wild-type parent (43). Lam and Gray-Owen showed that serial passage  
266 of *N. gonorrhoeae* in mice resulted an increased fraction of mice infected with each

267 subpassage and in a reproducible selection of variants with IgtG 'on', providing further  
268 strong evidence of the importance of HepII lactose expression in vivo (65).

269 We noted that MS11 2-Hex/G- inhibited mouse complement when grown in  
270 CMP-Neu5Ac. The amount of Neu5Ac incorporation onto HepI lactose in this mutant  
271 was likely too small to be detected by shifts on SDS-PAGE or by MS analysis, but was  
272 nevertheless sufficient for functional activity, limited as it was. In contrast, 15253/G-,  
273 which also expresses only lactose from HepI, did not inhibit mouse C3 deposition when  
274 grown in CMP-Neu5Ac-containing media, suggesting that the extent and influence of  
275 HepI lactose sialylation on function may differ across strains. Whether a difference in  
276 HepI lactose sialylation exists between the two strains is unclear despite differences in  
277 function, but could relate to differences in Lst sequence and/or levels of Lst activity.  
278 Translation of DNA sequences of the *lst* ORF of 15253 and MS11 showed a single  
279 amino acid sequence difference; 15253 possessed a Q (seen in 16 other *N.*  
280 *gonorrhoeae* Lst sequences), while MS11 possessed an E (seen in >400 *N.*  
281 *gonorrhoeae* Lst sequences) at position 266. The -35/-10 promoter sequence,  
282 transcription start sites and the Shine-Dalgarno sequence were identical in 15253 and  
283 MS11. Packiam et al showed wide variation in *lst* mRNA levels across gonococcal  
284 strains, but mRNA levels often did not correlate with Lst activity as measured by  
285 sialylation of Triton X-100 bacterial extracts (66).

286 Linkage of Neu5Ac is a key determinant of its ability to interact with the C-  
287 terminus of FH. Blaum and colleagues showed that the interaction between sialic acid  
288 and FH domain 20 is restricted only to  $\alpha$ 2-3-linked Neu5Ac;  $\alpha$ 2-6- or  $\alpha$ 2-8-linked  
289 Neu5Ac do not interact with FH (67). The Neu5Ac-lactose bond is resistant to  $\alpha$ 2-3

290 specific sialidase, suggesting an  $\alpha$ 2-6 linkage. In accordance with the findings of Blaum  
291 et al, sialylation of HepII lactose – presumably through an  $\alpha$ 2-6 linkage – did not  
292 increase FH binding to *N. gonorrhoeae*. We acknowledge that further structural  
293 characterization is necessary to confirm the nature of the Neu5Ac-lactose linkage. How  
294 Neu5Ac on HepII lactose regulates complement remains unclear. Similar to LNnT  
295 sialylation, Neu5Ac linked to LNnT may also inhibit the classical pathway by reducing  
296 binding of IgG directed against select surface targets to the bacterial surface.

297         Despite similar amounts of mAb 2C7 binding to sialylated compared to  
298 unsialylated 15253, the sialylated derivative was resistant (>50% survival) to mAb 2C7  
299 plus human complement when exposed to CMP-Neu5Ac concentrations  $\geq 3$   $\mu$ g/ml. A  
300 possible explanation is that targets for C4b and C3b on LOS (68), may be obscured by  
301 the presence of Neu5Ac, thereby diminishing Ab efficacy. However, mAb 2C7 remained  
302 effective against 15253 in the mouse vaginal colonization model, where the organism is  
303 sialylated and additional factors such as opsonophagocytosis may contribute to its  
304 bactericidal activity. Mouse FH and C4BP do not bind to gonococci (50, 51). Therefore,  
305 the barrier that mAb 2C7 must surmount to activate complement on gonococci in wild-  
306 type mice is likely to be lower than in humans. Ongoing studies have shown efficacy of  
307 mAb 2C7 against wild-type strains MS11 and FA1090, which both bind C4BP and when  
308 sialylated, also bind FH, in ‘dual’ human FH and C4BP transgenic mice (S.G, P.A.R and  
309 S.R, unpublished observations) suggesting that mAb 2C7 can overcome the effects of  
310 these complement inhibitors in vivo.

311         In conclusion, this novel site of sialylation on *N. gonorrhoeae* HepII lactose can  
312 inhibit complement activation and also engage Siglecs (45). These findings also explain

313 the ubiquitous expression of HepII lactose (an integral part of the '2C7 LOS epitope')  
314 among clinical isolates of *N. gonorrhoeae* and further validate targeting the 2C7 epitope  
315 with antibody-based vaccines and immunotherapeutics.

316 **Materials and Methods**

317

318 **Bacterial strains.** Strain 15253 was recovered from an individual with  
319 disseminated gonococcal infection and has been described previously (44). Only *IgtA*  
320 and *IgtE* are intact in its *IgtA-E* locus (69). Deletion of *IgtG* in 15253 to yield 15253/G-  
321 has been described previously (70). Deletion of LOS sialyltransferase (*Ist*) to yield  
322 15253  $\Delta$ *Ist* (*Ist::kan<sup>R</sup>*) was performed as described previously (54). All the LOS mutant  
323 derivatives of MS11 have been described previously (48). The LOS phenotypes of  
324 15253, 15253/G- and the MS11 mutants used in this study are listed in Figure 1.  
325 Seventy five additional isolates were obtained from subjects enrolled in a transmission  
326 study (Ref.) of gonococcal infection from men to women in Nanjing, China. All subjects  
327 provided written informed consent in accordance with requirements by Institutional  
328 Review Boards from: the University of Massachusetts Medical School; Boston  
329 Univeristy School of Medicine and the Institute of Dermatology, Chinese Academy of  
330 Medical Sciences & Peking Union Medical College, Nanjing, China.

331

332 **Normal human serum.** Serum was obtained from normal healthy adult  
333 volunteers with no history of gonococcal or meningococcal infection who provided  
334 informed consent. Participation was approved by the University of Massachusetts  
335 Institutional Review Board for the protection of human subjects. Serum was obtained  
336 from whole blood that was clotted at 25 °C for 30 min followed by centrifugation at 1500  
337 g for 20 min at 4 °C. Serum from 10 donors was pooled, aliquoted and stored at -80 °C.

338



339           **Mouse complement.** Use of animals in this study was performed in strict  
340 accordance with the recommendations in the Guide for the Care and Use of Laboratory  
341 Animals of the National Institutes of Health. The protocol was approved by the  
342 Institutional Animal Care and Use Committee (IACUC) at the University of  
343 Massachusetts Medical School. Mouse blood obtained by terminal cardiac puncture  
344 was allowed to clot for 20 min at room temperature, then placed on ice for 20 min and  
345 centrifuged at 10,000 g for 10 min at 4 °C. Serum was harvested and stored in single-  
346 use aliquots at -80 °C.

347

348           **Flow cytometry.** Factor H binding to *N. gonorrhoeae* was detected as described  
349 previously (71). Briefly,  $\sim 10^7$  bacteria in HBSS containing 1 mM CaCl<sub>2</sub> and 1 mM MgCl<sub>2</sub>  
350 (HBSS<sup>++</sup>) containing 0.1% BSA was incubated with 10 µg/ml purified human FH  
351 (Complement Technologies, Inc.) for 15 min at 37 °C. Bacteria-bound FH was detected  
352 with goat anti-human FH (1 µg/ml) (Complement Technologies, Inc.), followed by anti-  
353 goat IgG FITC (Sigma) at a dilution of 1:100. Bacteria were fixed in 1%  
354 paraformaldehyde in PBS and Data were acquired on a FACSCalibur flow cytometer  
355 and analyzed using FlowJo software.

356           Mouse C3 deposition on bacteria was measured by incubating  $10^7$  CFU of  
357 bacteria in HBSS<sup>++</sup>/BSA with mouse complement (concentration stated for each  
358 experiment) for 20 min at 37 °C. Mouse C3 fragments deposited on bacteria were  
359 detected using anti-mouse IgG FITC (MP Biomedicals) at a dilution of 1:100, and flow  
360 cytometry was performed as described above.

361

362           **SDS-PAGE.** LOS in Protease K (Calbiochem)-treated bacterial lysates prepared  
363 as described previously (48) in Tricine-SDS Sample Buffer (Boston Biomolecules) was  
364 visualized by electrophoresis on Criterion™ 16% Tris-Tricine gels (Bio-Rad) using Tris-  
365 Tricine-SDS Cathode buffer (Boston Biomolecules) at 100 V at 4 °C followed by silver  
366 staining (Bio-Rad Silver Stain kit).

367  
368           **Neuraminidase treatment.** Desialylation was carried out with  $\alpha$ 2-3-specific  
369 neuraminidase (New England Biolabs; Cat. No. P0743S). Approximately  $10^7$  bacteria in  
370 GlycoBuffer 1 (New England Biolabs) were treated with 16 U neuraminidase (reaction  
371 volume 100  $\mu$ l) for 1 h at 37 °C. Control reactions contained buffer alone. Bacteria were  
372 then incubated with mouse serum as described above to measure quantitatively, C3  
373 deposition.

374  
375           **Serum bactericidal assay.** Strain 15253 was grown in gonococcal liquid media  
376 (Morse A, Morse B and IsoVitaleX™ (72)) containing CMP-Neu5Ac at concentrations  
377 ranging from 0 to 100  $\mu$ g/ml in half- $\log_{10}$  increments; susceptibility to mAb 2C7 (5  $\mu$ g/ml)  
378 was determined by serum bactericidal assay as described previously (72) with minor  
379 modifications. The clinical isolates from Nanjing, China were all grown in liquid media as  
380 described above, supplemented with 2  $\mu$ g/ml of CMP-Neu5Ac. Approximately 2000  
381 CFU gonococci in HBSS<sup>++</sup>/0.1% BSA were incubated with 20% NHS either in the  
382 presence or absence of mAb 2C7. Final bactericidal reaction volumes were maintained  
383 at 75  $\mu$ l. Aliquots of 12.5  $\mu$ l were plated onto chocolate agar plates in duplicate at the

384 beginning of the assay ( $t_0$ ) and again after incubation at 37°C for 30 min ( $t_{30}$ ). Survival  
385 was calculated as the number of viable colonies at  $t_{30}$  relative to  $t_0$ .

386

387 **Mass spectroscopic analysis of LOS.** O-deacylated LOS was prepared as  
388 described previously (26). LC-MS was performed using a Waters Premier Q-TOF  
389 operated in the positive-ion mode with an Agilent 1260 capillary LC system. LC  
390 separation was done on an Agilent Eclipse XDB C8 column (5 $\mu$ m, 50 x 1mm) operated  
391 at 55 °C. The flow rate was 20  $\mu$ L/min. Solvent A: aqueous 0.2 % formic acid/0.028 %  
392 ammonia; solvent B: Isopropanol with 0.2% formic acid/0.028% ammonia. The following  
393 gradient was used: 0-2 min. 10 % B, 2-16 min linear gradient to 85 % B, 16-25 min. 85  
394 %B, 25-30 min. equilibration at 10% B.

395

396 **Anti-LOS mAbs.** Anti-LOS mAbs 3F11 (73), L8 (74), L1 (75) and 2C7 (42) have  
397 been described previously. Fig. 10A indicates the specificities of each of the mAbs

398

399 **Whole cell ELISA.** Whole cell ELISA was performed as described previously  
400 (71). Briefly, U-bottomed microtiter wells (Dynatech Laboratories, Inc., Chantilly, VA)  
401 were coated with 50  $\mu$ l of bacterial suspensions ( $\sim 10^8$  organisms/ml) in PBS for 3 h at  
402 37 °C, followed by incubation overnight at 4 °C. Plates were washed with PBS  
403 containing 0.05% Tween 20. Tissue culture supernatants containing mAbs 3F11, L8, L1  
404 and 2C7 were dispensed into wells and incubated for 1 h at 37 °C, followed by washing  
405 with PBS/0.05% Tween 20. Bound 2C7, L8 and L1 were disclosed with anti-mouse IgG

406 alkaline phosphatase (Sigma), and mAb 3F11 was detected with anti-mouse IgM  
407 alkaline phosphatase (Sigma).

408

409 ***Cmah KO mice.*** Unlike mice, humans lack the ability to convert Neu5Ac to  
410 Neu5Gc, because of an *Alu*-mediated deletion in a critical exon that encodes the  
411 enzyme, CMP-Neu5Ac hydroxylase (CMAH) (76). Deletion of *Cmah* in mice results in  
412 expression of only Neu5Ac. *Cmah* knockout (KO) mice were generated with a human-  
413 like deletion in exon 6 of *Cmah* as described previously (77) and were subsequently  
414 back-crossed >10 generations into a BALB/c background.

415

416 ***Mouse infection.*** The mouse vaginal colonization model developed by Jerse  
417 was used (78). Briefly, female *Cmah* KO mice in the diestrus phase of the estrous cycle  
418 were started on treatment (that day) with 0.1 mg Premarin<sup>®</sup> (Pfizer) in 200  $\mu$ l of water  
419 given subcutaneously on each of three days; -2, 0 and +2 days (before, the day of and  
420 after inoculation) to prolong the estrus phase of the reproductive cycle and promote  
421 susceptibility to *Ng* infection. Antibiotics (vancomycin, colistin, neomycin, trimethoprim  
422 and streptomycin (VCNTS)) ineffective against *N. gonorrhoeae* were also used to  
423 reduce competitive microflora (7). Mice (n=10/group) were infected on Day 0 with either  
424 strain 15253, 15253/G- or 15253  $\Delta$ *lst* (inoculum specified for each experiment).  
425 Vaginas were swabbed daily and plated on chocolate agar containing VCNTS to  
426 enumerate *N. gonorrhoeae* CFUs. The efficacy of mAb 2C7 in vivo against 15253 was  
427 performed in wild-type BALB/c mice (Jackson Laboratories) as described previously.  
428 Mice were treated with mAb 2C7 or control mouse IgG3 intraperitoneally, 10  $\mu$ g twice a

429 day on days -2, -1 (prior to) and 0 (the day of infection with strain 15253 and daily  
430 vaginal CFU enumeration was carried out as described above.

431

432 **Statistical analyses.** Experiments that compared clearance of *N. gonorrhoeae* in  
433 independent groups of mice estimated and tested three characteristics of the data (43):  
434 Time to clearance, longitudinal trends in mean  $\log_{10}$  CFU and the cumulative CFU as  
435 area under the curve (AUC). Statistical analyses were performed using mice that initially  
436 yielded bacterial colonies on Days 1 and/or 2. Median time to clearance was estimated  
437 using Kaplan-Meier survival curves; times to clearance were compared between groups  
438 using the Mantel-Cox log-rank test. Mean  $\log_{10}$  CFU trends over time were compared  
439 between groups using a linear mixed model with mouse as the random effect using both  
440 a random intercept and a random slope. A cubic function in time was determined to  
441 provide the best fit; random slopes were linear in time. A likelihood ratio test was used  
442 to compare nested models (with and without the interaction term of group and time) to  
443 test whether the trend differed over time between the two groups. The mean AUC ( $\log_{10}$   
444 CFU versus time) was computed for each mouse to estimate the bacterial burden over  
445 time (cumulative infection); the means under the curves were compared between  
446 groups using the nonparametric two-sample Wilcoxon rank-sum (Mann-Whitney) test  
447 because distributions were skewed or kurtotic. The Kruskal-Wallis equality-of-  
448 populations rank test was also applied to compare more than two groups in an  
449 experiment. Correlation between survival in serum bactericidal assays and mAb 2C7  
450 binding was performed by Spearman's non-parametric test. A cubic equation as used to  
451 generate the best-fit curve.

452 **Acknowledgments**

453 We thank Nancy Nowak and Samuel Fountain for technical assistance. This work was  
454 supported by grants from the National Institutes of Health / National Institutes of Allergy  
455 and Infectious Diseases, AI118161 (to S.R.), AI114790, AI132296 (to P.A.R and S.R.)  
456 and AI114710 (to P.A.R. and S.G.).

## 457 References

- 458 1. Newman L, Rowley J, Vander Hoorn S, Wijesooriya NS, Unemo M, Low N,  
459 Stevens G, Gottlieb S, Kiarie J, Temmerman M. 2015. Global Estimates of the  
460 Prevalence and Incidence of Four Curable Sexually Transmitted Infections in  
461 2012 Based on Systematic Review and Global Reporting. *PLoS One*  
462 10:e0143304.
- 463 2. Camara J, Serra J, Ayats J, Bastida T, Carnicer-Pont D, Andreu A, Ardanuy C.  
464 2012. Molecular characterization of two high-level ceftriaxone-resistant *Neisseria*  
465 *gonorrhoeae* isolates detected in Catalonia, Spain. *J Antimicrob Chemother*  
466 67:1858-60.
- 467 3. Lahra MM, Ryder N, Whiley DM. 2014. A new multidrug-resistant strain of  
468 *Neisseria gonorrhoeae* in Australia. *N Engl J Med* 371:1850-1.
- 469 4. Ohnishi M, Golparian D, Shimuta K, Saika T, Hoshina S, Iwasaku K, Nakayama  
470 S, Kitawaki J, Unemo M. 2011. Is *Neisseria gonorrhoeae* initiating a future era of  
471 untreatable gonorrhea?: detailed characterization of the first strain with high-level  
472 resistance to ceftriaxone. *Antimicrob Agents Chemother* 55:3538-45.
- 473 5. Unemo M, Shafer WM. 2014. Antimicrobial resistance in *Neisseria gonorrhoeae*  
474 in the 21st century: past, evolution, and future. *Clin Microbiol Rev* 27:587-613.
- 475 6. Katz AR, Komeya AY, Kirkcaldy RD, Whelen AC, Soge OO, Papp JR, Kersh EN,  
476 Wasserman GM, O'Connor NP, O'Brien PS, Sato DT, Maningas EV, Kunitomo  
477 GY, Tomas JE. 2017. Cluster of *Neisseria gonorrhoeae* Isolates With High-level  
478 Azithromycin Resistance and Decreased Ceftriaxone Susceptibility, Hawaii,  
479 2016. *Clin Infect Dis* 65:918-923.
- 480 7. Jerse AE, Wu H, Packiam M, Vonck RA, Begum AA, Garvin LE. 2011. Estradiol-  
481 Treated Female Mice as Surrogate Hosts for *Neisseria gonorrhoeae* Genital  
482 Tract Infections. *Front Microbiol* 2:107.
- 483 8. Apicella MA, Mandrell RE. 1989. Molecular mimicry as a factor in the  
484 pathogenesis of human neisserial infections: in vitro and in vivo modification of  
485 the lipooligosaccharide of *Neisseria gonorrhoeae* by N-acetylneuraminic acid.  
486 *Pediatr Infect Dis J* 8:901-2.
- 487 9. Balthazar JT, Gusa A, Martin LE, Choudhury B, Carlson R, Shafer WM. 2011.  
488 Lipooligosaccharide Structure is an Important Determinant in the Resistance of  
489 *Neisseria Gonorrhoeae* to Antimicrobial Agents of Innate Host Defense. *Front*  
490 *Microbiol* 2:30.
- 491 10. Blake MS, Blake CM, Apicella MA, Mandrell RE. 1995. Gonococcal opacity:  
492 lectin-like interactions between Opa proteins and lipooligosaccharide. *Infect*  
493 *Immun* 63:1434-1439.
- 494 11. Edwards JL, Apicella MA. 2002. The role of lipooligosaccharide in *Neisseria*  
495 *gonorrhoeae* pathogenesis of cervical epithelia: lipid A serves as a C3 acceptor  
496 molecule. *Cell Microbiol* 4:585-98.
- 497 12. Schneider H, Griffiss JM, Boslego JW, Hitchcock PJ, Zahos KM, Apicella MA.  
498 1991. Expression of paragloboside-like lipooligosaccharides may be a necessary  
499 component of gonococcal pathogenesis in men. *J Exp Med* 174:1601-1605.
- 500 13. Schneider H, Griffiss JM, Mandrell RE, Jarvis GA. 1985. Elaboration of a 3.6-  
501 kilodalton lipooligosaccharide, antibody against which is absent from human



- 502 sera, is associated with serum resistance of *Neisseria gonorrhoeae*. Infect  
503 Immun 50:672-677.
- 504 14. Song W, Ma L, Chen R, Stein DC. 2000. Role of lipooligosaccharide in Opa-  
505 independent invasion of *Neisseria gonorrhoeae* into human epithelial cells. J Exp  
506 Med 191:949-60.
- 507 15. van Vliet SJ, Steeghs L, Bruijns SC, Vaezirad MM, Snijders Blok C, Arenas  
508 Busto JA, Deken M, van Putten JP, van Kooyk Y. 2009. Variation of *Neisseria*  
509 *gonorrhoeae* lipooligosaccharide directs dendritic cell-induced T helper  
510 responses. PLoS Pathog 5:e1000625.
- 511 16. Wetzler LM, Barry K, Blake MS, Gotschlich EC. 1992. Gonococcal  
512 lipooligosaccharide sialylation prevents complement- dependent killing by  
513 immune sera. Infect Immun 60:39-43.
- 514 17. Yang QL, Gotschlich EC. 1996. Variation of gonococcal lipooligosaccharide  
515 structure is due to alterations in poly-G tracts in *lgt* genes encoding glycosyl  
516 transferases. J Exp Med 183:323-7.
- 517 18. Zhang P, Schwartz O, Pantelic M, Li G, Knazze Q, Nobile C, Radovich M, He J,  
518 Hong SC, Klena J, Chen T. 2006. DC-SIGN (CD209) recognition of *Neisseria*  
519 *gonorrhoeae* is circumvented by lipooligosaccharide variation. J Leukoc Biol  
520 79:731-8.
- 521 19. Patrone JB, Stein DC. 2007. Effect of gonococcal lipooligosaccharide variation  
522 on human monocytic cytokine profile. BMC Microbiol 7:7.
- 523 20. Mandrell RE, Apicella MA. 1993. Lipo-oligosaccharides (LOS) of mucosal  
524 pathogens: molecular mimicry and host-modification of LOS. Immunobiology  
525 187:382-402.
- 526 21. Mandrell RE, Griffiss JM, Macher BA. 1988. Lipooligosaccharides (LOS) of  
527 *Neisseria gonorrhoeae* and *Neisseria meningitidis* have components that are  
528 immunochemically similar to precursors of human blood group antigens.  
529 Carbohydrate sequence specificity of the mouse monoclonal antibodies that  
530 recognize crossreacting antigens on LOS and human erythrocytes. J Exp Med  
531 168:107-26.
- 532 22. Mandrell RE. 1992. Further antigenic similarities of *Neisseria gonorrhoeae*  
533 lipooligosaccharides and human glycosphingolipids. Infect Immun 60:3017-3020.
- 534 23. Parsons NJ, Constantinidou C, Cole JA, Smith H. 1994. Sialylation of  
535 lipopolysaccharide by CMP-NANA in viable gonococci is enhanced by low Mr  
536 material released from blood cell extracts but not by some UDP sugars. Microb  
537 Pathog 16:413-21.
- 538 24. Smith H, Parsons NJ, Cole JA. 1995. Sialylation of neisserial lipopolysaccharide:  
539 a major influence on pathogenicity. Microb Pathog 19:365-77.
- 540 25. Wakarchuk WW, Watson D, St Michael F, Li J, Wu Y, Brisson JR, Young NM,  
541 Gilbert M. 2001. Dependence of the bi-functional nature of a sialyltransferase  
542 from *Neisseria meningitidis* on a single amino acid substitution. J Biol Chem  
543 276:12785-90.
- 544 26. Gulati S, Cox A, Lewis LA, Michael FS, Li J, Boden R, Ram S, Rice PA. 2005.  
545 Enhanced factor H binding to sialylated Gonococci is restricted to the sialylated  
546 lacto-N-neotetraose lipooligosaccharide species: implications for serum



- 547 resistance and evidence for a bifunctional lipooligosaccharide sialyltransferase in  
548 *Gonococci*. *Infect Immun* 73:7390-7.
- 549 27. Nairn CA, Cole JA, Patel PV, Parsons NJ, Fox JE, Smith H. 1988. Cytidine 5'-  
550 monophospho-N-acetylneuraminic acid or a related compound is the low Mr  
551 factor from human red blood cells which induces gonococcal resistance to killing  
552 by human serum. *J Gen Microbiol* 134:3295-306.
- 553 28. Elkins C, Carbonetti NH, Varela VA, Stirewalt D, Klapper DG, Sparling PF. 1992.  
554 Antibodies to N-terminal peptides of gonococcal porin are bactericidal when  
555 gonococcal lipopolysaccharide is not sialylated. *Mol Microbiol* 6:2617-28.
- 556 29. Ram S, Sharma AK, Simpson SD, Gulati S, McQuillen DP, Pangburn MK, Rice  
557 PA. 1998. A novel sialic acid binding site on factor H mediates serum resistance  
558 of sialylated *Neisseria gonorrhoeae*. *J Exp Med* 187:743-752.
- 559 30. Bergfeld AK, Claus H, Vogel U, Muhlenhoff M. 2007. Biochemical  
560 characterization of the polysialic acid specific O-acetyltransferase NeuO of  
561 *Escherichia coli* K1. *J Biol Chem*.
- 562 31. Blacklow RS, Warren L. 1962. Biosynthesis of sialic acids by *Neisseria*  
563 *meningitidis*. *J Biol Chem* 237:3520-6.
- 564 32. Edwards MS, Kasper DL, Jennings HJ, Baker CJ, Nicholson-Weller A. 1982.  
565 Capsular sialic acid prevents activation of the alternative complement pathway by  
566 type III group B streptococci. *J Immunol* 128:1278-1283.
- 567 33. Markham RB, Nicholson-Weller A, Schiffman G, Kasper DL. 1982. The presence  
568 of sialic acid on two related bacterial polysaccharides determines the site of the  
569 primary immune response and the effect of complement depletion on the  
570 response in mice. *J Immunol* 128:2731-2733.
- 571 34. Ourth DD, Bachinski LM. 1987. Bacterial sialic acid modulates activation of the  
572 alternative complement pathway of channel catfish (*Ictalurus punctatus*). *Dev*  
573 *Comp Immunol* 11:551-64.
- 574 35. Severi E, Randle G, Kivlin P, Whitfield K, Young R, Moxon R, Kelly D, Hood D,  
575 Thomas GH. 2005. Sialic acid transport in *Haemophilus influenzae* is essential  
576 for lipopolysaccharide sialylation and serum resistance and is dependent on a  
577 novel tripartite ATP-independent periplasmic transporter. *Mol Microbiol* 58:1173-  
578 85.
- 579 36. Silver RP, Vimr ER. 1990. Polysialic acid capsule of *Escherichia coli* K1, p 39-60.  
580 *In* Iglewski B, Clark V (ed), *The Bacteria*, vol XI. Academic Press, Inc., New York.
- 581 37. Tomlinson S, Pontes de Carvalho LC, Vandekerckhove F, Nussenzweig V. 1994.  
582 Role of sialic acid in the resistance of *Trypanosoma cruzi* trypomastigotes to  
583 complement. *J Immunol* 153:3141-3147.
- 584 38. Vogel U, Hammerschmidt S, Frosch M. 1996. Sialic acids of both the capsule  
585 and the sialylated lipooligosaccharide of *Neisseria meningitis* serogroup B are  
586 prerequisites for virulence of meningococci in the infant rat. *Med Microbiol*  
587 *Immunol (Berl)* 185:81-7.
- 588 39. Li Y, Yu H, Cao H, Muthana S, Chen X. 2012. *Pasteurella multocida* CMP-sialic  
589 acid synthetase and mutants of *Neisseria meningitidis* CMP-sialic acid  
590 synthetase with improved substrate promiscuity. *Appl Microbiol Biotechnol*  
591 93:2411-23.

- 592 40. Avril T, Wagner ER, Willison HJ, Crocker PR. 2006. Sialic acid-binding  
593 immunoglobulin-like lectin 7 mediates selective recognition of sialylated glycans  
594 expressed on *Campylobacter jejuni* lipooligosaccharides. *Infect Immun* 74:4133-  
595 41.
- 596 41. Hirsch RL, Griffin DE, Winkelstein JA. 1981. Host modification of Sindbis virus  
597 sialic acid content influences alternative complement pathway activation and  
598 virus clearance. *J Immunol* 127:1740-3.
- 599 42. Gulati S, McQuillen DP, Mandrell RE, Jani DB, Rice PA. 1996. Immunogenicity of  
600 *Neisseria gonorrhoeae* lipooligosaccharide epitope 2C7, widely expressed in vivo  
601 with no immunochemical similarity to human glycosphingolipids [published  
602 erratum appears in *J Infect Dis* 1997 Apr;175(4):1027]. *J Infect Dis* 174:1223-37.
- 603 43. Gulati S, Zheng B, Reed GW, Su X, Cox AD, St Michael F, Stupak J, Lewis LA,  
604 Ram S, Rice PA. 2013. Immunization against a Saccharide Epitope Accelerates  
605 Clearance of Experimental Gonococcal Infection. *PLoS Pathog* 9:e1003559.
- 606 44. Yamasaki R, Kerwood DE, Schneider H, Quinn KP, Griffiss JM, Mandrell RE.  
607 1994. The structure of lipooligosaccharide produced by *Neisseria gonorrhoeae*,  
608 strain 15253, isolated from a patient with disseminated infection: evidence for a  
609 new glycosylation pathway of gonococcal lipooligosaccharide. *J Biol Chem*  
610 269:30345-30351.
- 611 45. Landig CS, Fong J, Hazel A, Agarwal S, Schwarz F, Massari P, Nizet V, S. R,  
612 Varki A. 2016. The human-specific pathogen *Neisseria gonorrhoeae* engages  
613 innate immunoregulatory Siglec receptors in a species-specific manner. 20th  
614 International Pathogenic *Neisseria* Conference, Manchester, UK. p 172.
- 615 46. Brinkman-Van der Linden EC, Angata T, Reynolds SA, Powell LD, Hedrick SM,  
616 Varki A. 2003. CD33/Siglec-3 binding specificity, expression pattern, and  
617 consequences of gene deletion in mice. *Mol Cell Biol* 23:4199-206.
- 618 47. Crocker PR, Paulson JC, Varki A. 2007. Siglecs and their roles in the immune  
619 system. *Nat Rev Immunol* 7:255-66.
- 620 48. Chakraborti S, Lewis LA, Cox AD, St Michael F, Li J, Rice PA, Ram S. 2016.  
621 Phase-Variable Heptose I Glycan Extensions Modulate Efficacy of 2C7 Vaccine  
622 Antibody Directed against *Neisseria gonorrhoeae* Lipooligosaccharide. *J*  
623 *Immunol* 196:4576-86.
- 624 49. Ram S, McQuillen DP, Gulati S, Elkins C, Pangburn MK, Rice PA. 1998. Binding  
625 of complement factor H to loop 5 of porin protein 1A: a molecular mechanism of  
626 serum resistance of nonsialylated *Neisseria gonorrhoeae*. *J Exp Med* 188:671-  
627 680.
- 628 50. Ngampasutadol J, Ram S, Blom AM, Jarva H, Jerse AE, Lien E, Goguen J,  
629 Gulati S, Rice PA. 2005. Human C4b-binding protein selectively interacts with  
630 *Neisseria gonorrhoeae* and results in species-specific infection. *Proc Natl Acad*  
631 *Sci U S A* 102:17142-7.
- 632 51. Ngampasutadol J, Ram S, Gulati S, Agarwal S, Li C, Visintin A, Monks B, Madico  
633 G, Rice PA. 2008. Human Factor H Interacts Selectively with *Neisseria*  
634 *gonorrhoeae* and Results in Species-Specific Complement Evasion. *J Immunol*  
635 180:3426-35.
- 636 52. Gulati S, Schoenhofen IC, B. Z, Unemo M, Landig CS, Reed GW, Varki A, Rice  
637 PA, Ram S. 2016. A sialic acid analog attenuates gonococcal infection in mice

- 638 that express exclusively human-like sialic acid that enhances the burden of  
639 infection, p. *In* (ed),
- 640 53. Yamasaki R, Koshino H, Kurono S, Nishinaka Y, McQuillen DP, Kume A, Gulati  
641 S, Rice PA. 1999. Structural and immunochemical characterization of a *Neisseria*  
642 gonorrhoeae epitope defined by a monoclonal antibody 2C7; the antibody  
643 recognizes a conserved epitope on specific lipo-oligosaccharides in spite of the  
644 presence of human carbohydrate epitopes. *J Biol Chem* 274:36550-8.
- 645 54. Lewis LA, Gulati S, Burrowes E, Zheng B, Ram S, Rice PA. 2015. alpha-2,3-  
646 Sialyltransferase Expression Level Impacts the Kinetics of Lipooligosaccharide  
647 Sialylation, Complement Resistance, and the Ability of *Neisseria gonorrhoeae* to  
648 Colonize the Murine Genital Tract. *MBio* 6:e02465-14.
- 649 55. Wu H, Jerse AE. 2006. Alpha-2,3-sialyltransferase enhances *Neisseria*  
650 gonorrhoeae survival during experimental murine genital tract infection. *Infect*  
651 *Immun* 74:4094-103.
- 652 56. Kogan G, Uhrin D, Brisson JR, Jennings HJ. 1997. Structural basis of the  
653 *Neisseria meningitidis* immunotypes including the L4 and L7 immunotypes.  
654 *Carbohydr Res* 298:191-9.
- 655 57. Rahman MM, Stephens DS, Kahler CM, Glushka J, Carlson RW. 1998. The  
656 lipooligosaccharide (LOS) of *Neisseria meningitidis* serogroup B strain NMB  
657 contains L2, L3, and novel oligosaccharides, and lacks the lipid-A 4'-phosphate  
658 substituent. *Carbohydr Res* 307:311-24.
- 659 58. Mandrell RE, Griffiss JM, Smith H, Cole JA. 1993. Distribution of a  
660 lipooligosaccharide-specific sialyltransferase in pathogenic and non-pathogenic  
661 *Neisseria*. *Microb Pathog* 14:315-27.
- 662 59. Schneider H, Cross AS, Kuschner RA, Taylor DN, Sadoff JC, Boslego JW, Deal  
663 CD. 1995. Experimental human gonococcal urethritis: 250 *Neisseria*  
664 gonorrhoeae MS11mkC are infective. *J Infect Dis* 172:180-5.
- 665 60. Wu H, Shafer WM, Jerse AE. 2012. Relative importance of LOS sialylation and  
666 the MtrC-MtrD-MtrE active efflux pump in gonococcal evasion of host innate  
667 defenses, abstr XVIIIth International Pathogenic *Neisseria* Conference,  
668 Wuerzburg, Germany,
- 669 61. Wu H, Jerse AE. Sialylation Protects Intracellular *Neisseria gonorrhoeae* from  
670 Nonoxidative Killing by Polymorphonuclear Leukocytes and Antimicrobial  
671 Peptides, p 126. *In* (ed),
- 672 62. Jones C, Virji M, Crocker PR. 2003. Recognition of sialylated meningococcal  
673 lipopolysaccharide by siglecs expressed on myeloid cells leads to enhanced  
674 bacterial uptake. *Mol Microbiol* 49:1213-25.
- 675 63. Greiner LL, Edwards JL, Shao J, Rabinak C, Entz D, Apicella MA. 2005. Biofilm  
676 Formation by *Neisseria gonorrhoeae*. *Infect Immun* 73:1964-70.
- 677 64. Gilbert M, Watson DC, Cunningham AM, Jennings MP, Young NM, Wakarchuk  
678 WW. 1996. Cloning of the lipooligosaccharide alpha-2,3-sialyltransferase from  
679 the bacterial pathogens *Neisseria meningitidis* and *Neisseria gonorrhoeae*. *J Biol*  
680 *Chem* 271:28271-6.
- 681 65. Lam J, Gray-Owen SD. Genetic adaptation contributing to increased gonococcal  
682 fitness during vaginal infection of CEACAM-humanized mice, p 24. *In* (ed),

- 683 66. Packiam M, Shell DM, Liu SV, Liu YB, McGee DJ, Srivastava R, Seal S, Rest  
684 RF. 2006. Differential expression and transcriptional analysis of the alpha-2,3-  
685 sialyltransferase gene in pathogenic *Neisseria* spp. *Infect Immun* 74:2637-50.
- 686 67. Blaum BS, Hannan JP, Herbert AP, Kavanagh D, Uhrin D, Stehle T. 2015.  
687 Structural basis for sialic acid-mediated self-recognition by complement factor H.  
688 *Nat Chem Biol* 11:77-83.
- 689 68. Lewis LA, Ram S, Prasad A, Gulati S, Getzlaff S, Blom AM, Vogel U, Rice PA.  
690 2008. Defining targets for complement components C4b and C3b on the  
691 pathogenic neisseriae. *Infect Immun* 76:339-50.
- 692 69. Erwin AL, Haynes PA, Rice PA, Gotschlich EC. 1996. Conservation of the  
693 lipooligosaccharide synthesis locus *lgt* among strains of *Neisseria gonorrhoeae*:  
694 requirement for *lgtE* in synthesis of the 2C7 epitope and of the beta chain of  
695 strain 15253. *J Exp Med* 184:1233-41.
- 696 70. Ngampasutadol J, Rice PA, Walsh MT, Gulati S. 2006. Characterization of a  
697 peptide vaccine candidate mimicking an oligosaccharide epitope of *Neisseria*  
698 *gonorrhoeae* and resultant immune responses and function. *Vaccine* 24:157-70.
- 699 71. Gulati S, Schoenhofen IC, Whitfield DM, Cox AD, Li J, St Michael F, Vinogradov  
700 EV, Stupak J, Zheng B, Ohnishi M, Unemo M, Lewis LA, Taylor RE, Landig CS,  
701 Diaz S, Reed GW, Varki A, Rice PA, Ram S. 2015. Utilizing CMP-Sialic Acid  
702 Analogs to Unravel *Neisseria gonorrhoeae* Lipooligosaccharide-Mediated  
703 Complement Resistance and Design Novel Therapeutics. *PLoS Pathogens*  
704 11:e1005290.
- 705 72. McQuillen DP, Gulati S, Rice PA. 1994. Complement-mediated bacterial killing  
706 assays. *Methods Enzymol* 236:137-47.
- 707 73. Apicella MA, Mandrell RE, Shero M, Wilson M, Griffiss JM, Brooks GF, Fenner C,  
708 Breen CF, Rice PA. 1990. Modification by sialic acid of *Neisseria gonorrhoeae*  
709 lipooligosaccharide epitope expression in human urethral exudates: an  
710 immunoelectron microscopic analysis. *J Infect Dis* 162:506-512.
- 711 74. O'Connor ET, Swanson KV, Cheng H, Fluss K, Griffiss JM, Stein DC. 2008.  
712 Structural requirements for monoclonal antibody 2-1-L8 recognition of neisserial  
713 lipooligosaccharides. *Hybridoma (Larchmt)* 27:71-9.
- 714 75. McLeod Griffiss J, Brandt BL, Saunders NB, Zollinger W. 2000. Structural  
715 relationships and sialylation among meningococcal L1, L8, and L3,7  
716 lipooligosaccharide serotypes. *J Biol Chem* 275:9716-24.
- 717 76. Chou HH, Takematsu H, Diaz S, Iber J, Nickerson E, Wright KL, Muchmore EA,  
718 Nelson DL, Warren ST, Varki A. 1998. A mutation in human CMP-sialic acid  
719 hydroxylase occurred after the Homo-Pan divergence. *Proc Natl Acad Sci U S A*  
720 95:11751-6.
- 721 77. Hedlund M, Tangvoranuntakul P, Takematsu H, Long JM, Housley GD,  
722 Kozutsumi Y, Suzuki A, Wynshaw-Boris A, Ryan AF, Gallo RL, Varki N, Varki A.  
723 2007. N-glycolylneuraminic acid deficiency in mice: implications for human  
724 biology and evolution. *Mol Cell Biol* 27:4340-6.
- 725 78. Jerse AE. 1999. Experimental gonococcal genital tract infection and opacity  
726 protein expression in estradiol-treated mice. *Infect Immun* 67:5699-708.
- 727 79. Varki A, Cummings RD, Aebi M, Packer NH, Seeberger PH, Esko JD, Stanley P,  
728 Hart G, Darvill A, Kinoshita T, Prestegard JJ, Schnaar RL, Freeze HH, Marth JD,

729 Bertozzi CR, Etzler ME, Frank M, Vliegenthart JF, Lutteke T, Perez S, Bolton E,  
730 Rudd P, Paulson J, Kanehisa M, Toukach P, Aoki-Kinoshita KF, Dell A,  
731 Narimatsu H, York W, Taniguchi N, Kornfeld S. 2015. Symbol Nomenclature for  
732 Graphical Representations of Glycans. *Glycobiology* 25:1323-4.

733



734 **Figure Legends**

735 **Fig. 1.** LOS glycan extensions from heptose (Hep) I and HepII elaborated by *N.*  
736 *gonorrhoeae* strains used in this study. Glycan extensions from HepI and HepII of the  
737 major LOS structure represented by the strains is shown using the symbol  
738 nomenclature for graphical representation of individual glycans (79). *N. gonorrhoeae*  
739 lack the ability to produce CMP-Neu5Ac, therefore capping of LOS with Neu5Ac  
740 requires the addition of CMP-Neu5Ac to growth media.

741  
742 **Fig. 2.** Evidence of sialylation of HepII lactose on *N. gonorrhoeae* 15253 and MS11 2-  
743 Hex/G+. *N. gonorrhoeae* 15253 and MS11 2-Hex/G+ both express lactose from HepI  
744 and HepII. Their mutants that lack HepII lactose were constructed by deleting *IgtG*  
745 (15253/G- and MS11 2-Hex/G-). 15253  $\Delta$ Ist lacks LOS sialyltransferase and cannot add  
746 Neu5Ac to LOS. MS11 4-Hex/G- expresses the sialylatable LNnT structure from HepI  
747 and served as a positive control for sialylation. All strains were in media with (+) or  
748 without (-) added CMP-Neu5Ac (100  $\mu$ g/ml) for 2 h at 37 °C. Bacterial lysates were  
749 digested with protease K, separated on a 16% Tricine gel and LOS was visualized by  
750 silver staining. Retardation of LOS mobility following growth in CMP-Neu5Ac-containing  
751 media relative to LOS from bacteria grown in media devoid of CMP-Neu5Ac indicates  
752 sialylation.

753  
754 **Fig. 3.** Enhanced FH binding upon LOS sialylation is restricted to strains that express  
755 the LNnT LOS structure. FH binding to isogenic LOS mutants of MS11 that express 2-  
756 Hex (lactose), 3-Hex (PK-like) or 4-Hex (LNnT) structures from HepI, with (G+) or

757 without (G-) lactose extensions from HepII were grown in media alone or media  
758 containing CMP-Neu5Ac (25 µg/ml). Bacteria were incubated with FH (10 µg/ml) and  
759 bound FH measured by flow cytometry. Black bars, unsialylated bacteria; grey bars,  
760 sialylated bacteria. Control reactions, where FH was excluded, showed a median  
761 fluorescence below 10. Y-axis, median fluorescence (mean [range] of 2 separate  
762 observations).

763

764 **Fig. 4.** Sialylation of 15253 LOS inhibits complement activation. Strains 15253 and its  
765 isogenic mutant derivatives, 15253/G- (lacks HepII glycan extensions) and 15253  $\Delta$ lst  
766 (lacks LOS sialyltransferase) were grown without or with CMP-Neu5Ac (25 µg/ml),  
767 incubated in 15% normal mouse serum for 20 min at 37 °C. C3 deposited on the  
768 bacterial surface was measured by flow cytometry. C3 deposited on bacteria grown in  
769 the presence or absence of CMP-Neu5Ac is shown by the grey shaded and solid black  
770 line histograms, respectively. Controls (no serum added) are shown by the broken lines.  
771 Numbers alongside histograms represent median fluorescence intensity (the border or  
772 shading of the text boxes that contain the numbers) correspond to that of the  
773 histograms). X-axis, fluorescence ( $\log_{10}$  scale); Y-axis, counts. One representative  
774 experiment of at least two reproducible repeats is shown.

775

776 **Fig. 5.** Complement inhibition by MS11 mutants that express lactose LOS extensions.  
777 Isogenic MS11 mutants that express predominantly lactose (2-Hex), PK structure (3-  
778 Hex) or LNnT (4-Hex) from HepI, with (G+) or without (G-) lactose from HepII, were  
779 grown in the absence or presence of CMP-Neu5Ac (25 µg/ml) and were incubated with

780 15% normal mouse serum for 20 min at 37 °C. Mouse C3 deposited on the bacterial  
781 surface was measured by flow cytometry. C3 deposited on bacteria grown in the  
782 presence or absence of CMP-Neu5Ac is shown by the grey shaded areas and solid  
783 black lines, respectively. Controls (no serum added) are shown by the broken lines.  
784 Numbers alongside histograms represent median fluorescence intensity (the border or  
785 shading of the text boxes that contain the numbers) correspond to that of the  
786 histograms). X-axis, fluorescence ( $\log_{10}$  scale); Y-axis, counts. One representative  
787 experiment of at least two reproducible repeats is shown.

788

789

790 **Fig. 6.** Neu5Ac added to HepII lactose resists removal by  $\alpha$ 2-3-sialidase. MS11 2-Hex-  
791 G+ and 15253 were grown in the absence or presence of CMP-Neu5Ac (25  $\mu$ g/ml).  
792 MS11 4-Hex/G-, which expresses LNnT that is sialylated through an  $\alpha$ 2-3-linkage and  
793 MS11 3-Hex/G-, which expresses the P<sup>K</sup>-like LOS that becomes sialylated through an  
794  $\alpha$ 2-6-linkage, were used as positive and negative controls for desialylation, respectively.  
795 Bacteria were treated with recombinant  $\alpha$ 2-3-specific sialidase or with neuraminidase  
796 (sialidase) buffer alone, then incubated with 15% normal mouse serum for 20 min at 37  
797 °C. Mouse C3 deposited on bacteria (shown as median fluorescence intensity (MFI) on  
798 the Y-axis) was measured by flow cytometry. Controls (no added serum) showed  
799 fluorescence less than 10 units and have been omitted for simplicity. Each bar  
800 represents the mean (range) of two separate experiments.

801



802 **Fig. 7.** Sialylation of HepII lactose enhances virulence of strain 15253. Cmah knockout  
803 mice that express only Neu5Ac (the form of sialic acid found in humans), but not  
804 Neu5Gc (the form in wild-type mice), were infected with wild-type (WT) *N. gonorrhoeae*  
805 15253 ( $5.5 \times 10^7$  CFU) and its isogenic mutants 15253/G- (lacks any HepII glycan  
806 extension;  $4.3 \times 10^7$  CFU) and 15253  $\Delta/st$  (lacks LOS sialyltransferase;  $4.9 \times 10^7$  CFU)  
807 ( $n=10$  mice per group). Vaginas were swabbed daily to enumerate *N. gonorrhoeae*  
808 CFUs. **A.** Kaplan Meier curves showing time to clearance. WT bacteria versus G- and  
809 WT versus  $\Delta/st$ ,  $P<0.0001$  by Mantel-Cox log-rank test. **B.** CFU versus time. X-axis,  
810 day; Y-axis, CFU ( $\log_{10}$ ). **C.** Area Under Curve (AUC) analysis for consolidated bacterial  
811 burden over time. Pairwise comparisons between G- and  $\Delta/st$  with the control group  
812 were made by Mann-Whitney's non-parametric t test. Comparisons across groups were  
813 made by one-way ANOVA (Kruskal-Wallis non-parametric test;  $P<0.0001$ ).

814

815 **Fig. 8.** Effect of HepII lactose sialylation on the binding and bactericidal efficacy of mAb  
816 2C7. **A.** Sialylation decreases binding of mAb 2C7 to MS11 2-Hex/G+, but not to 15253.  
817 *N. gonorrhoeae* were grown in media alone or media supplemented with 25  $\mu\text{g/ml}$  CMP-  
818 Neu5Ac and binding of mAb 2C7 (10  $\mu\text{g/ml}$ ) to 15253 (left graph) and MS11 2-Hex/G+  
819 was measured by flow cytometry. The solid black line shows mAb 2C7 binding to  
820 unsialylated bacteria; the grey shaded histogram, mAb 2C7 binding to sialylated  
821 bacteria. The control indicates bacteria incubated with anti-mouse IgG-FITC (no added  
822 mAb 2C7). One experiment of two reproducible repeats is shown. **B.** Addition of CMP-  
823 Neu5Ac to growth media in increasing concentrations decreases the bactericidal  
824 efficacy of mAb 2C7 against *N. gonorrhoeae* 15253. Serum bactericidal assays were

825 performed with 20% pooled normal human serum (NHS) as the complement source.  
826 Where indicated, mAb 2C7 was added to a concentration of 10 µg/ml. Y-axis, percent  
827 survival following incubation of the reaction for 30 min relative to survival at 0 min.

828

829 **Fig. 9.** mAb 2C7 is attenuates infection with *N. gonorrhoeae* in the murine vaginal  
830 colonization model. Wild-type BALB/c mice were treated with either mAb 2C7 (10 µg  
831 intraperitoneally twice a day on days -2, -1 and 0) or a similar dose of control mouse  
832 IgG3 and then infected with  $5 \times 10^5$  CFU of 15253. Vaginas were swabbed daily to  
833 enumerate CFUs. **A.** Kaplan Meier curves showing time to clearance. The two groups  
834 were compared using the Mantel-Cox log-rank test. **B.** CFU versus time. X-axis, day; Y-  
835 axis, CFU ( $\log_{10}$ ). **C.** Area Under Curve (AUC) analysis showing consolidated bacterial  
836 burdens over time. Pairwise comparisons between the two groups were made by Mann-  
837 Whitney's non-parametric t test.

838

839 **Fig. 10.** Expression of the 2C7 LOS epitope by clinical isolates from Nanjing, China and  
840 bactericidal efficacy of mAb 2C7. **A.** Schematic showing reactivity of anti-LOS mAbs  
841 2C7, L1, L8 and 3F11. mAb 2C7 requires expression of lactose from HepI and HepII  
842 simultaneously (53). mAb L8 recognizes lactose from HepI in conjunction with a  
843 phosphoethanolamine (PEA) at the 3-position of HepII (74). Expression of 3-PEA from  
844 HepII requires *IgtG* to be phase-varied 'OFF', thus binding of mAb 2C7 and L8 occur  
845 exclusively and do not bind to overlapping epitopes. mAb 3F11 binds to unsialylated  
846 terminal lactosamine of the LNnT structure; any extension beyond lactosamine – for  
847 example with GalNAc [*IgtD* phase-varied 'ON'] or the addition of Neu5Ac by adding

848 CMP-Neu5Ac to growth media – abrogates mAb 3F11 binding (73). mAb L1 binds to the  
849 P<sup>K</sup>-like globotriose structure (Gal $\alpha$ (1,4)-Gal $\beta$ (1,4)-Glc) (75). **B.** Reactivity of mAbs 2C7,  
850 L1, L8 and 3F11 to 75 minimally passaged *N. gonorrhoeae* isolates recovered from men  
851 with urethritis attending the Nanjing (China) STD clinic. Binding of mAbs was  
852 determined by whole-cell ELISA. mAbs 2C7, L1 and L8 are all mouse IgG, while 3F11 is  
853 IgM, therefore shown as a separate graph. **C.** Complement-dependent bactericidal  
854 activity of mAb 2C7 against the first 62/75 isolates collected from men with urethritis in a  
855 Nanjing (China) study of gonococcal transmission from men to women as a function of  
856 mAb 2C7 binding. Bacteria were grown in media containing CMP-Neu5Ac (2  $\mu$ g/ml) to  
857 enable them to fully resist killing (>100% survival) by 16.7% normal human serum  
858 (NHS). Survival of bacteria at 30 min following incubation with mAb 2C7 (5  $\mu$ g/ml) plus  
859 NHS (16.7%) is shown as a function of mAb 2C7 binding (X-axis).

Fig. 1

| Strain(s)                          | Predominant LOS structure                                                            |
|------------------------------------|--------------------------------------------------------------------------------------|
| 15253 (wild-type)<br>MS11 2-Hex/G+ | 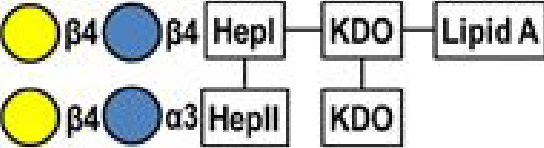   |
| 15253/G-<br>MS11 2-Hex/G-          |    |
| MS11 3-Hex/G-                      |    |
| MS11 3-Hex/G+                      |   |
| MS11 4-Hex/G-                      |  |
| MS11 4-Hex/G+                      |  |

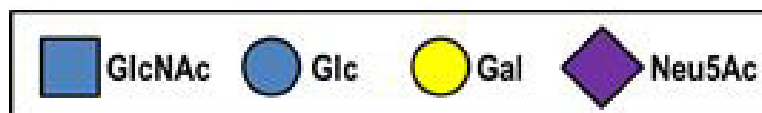

**Fig. 2**

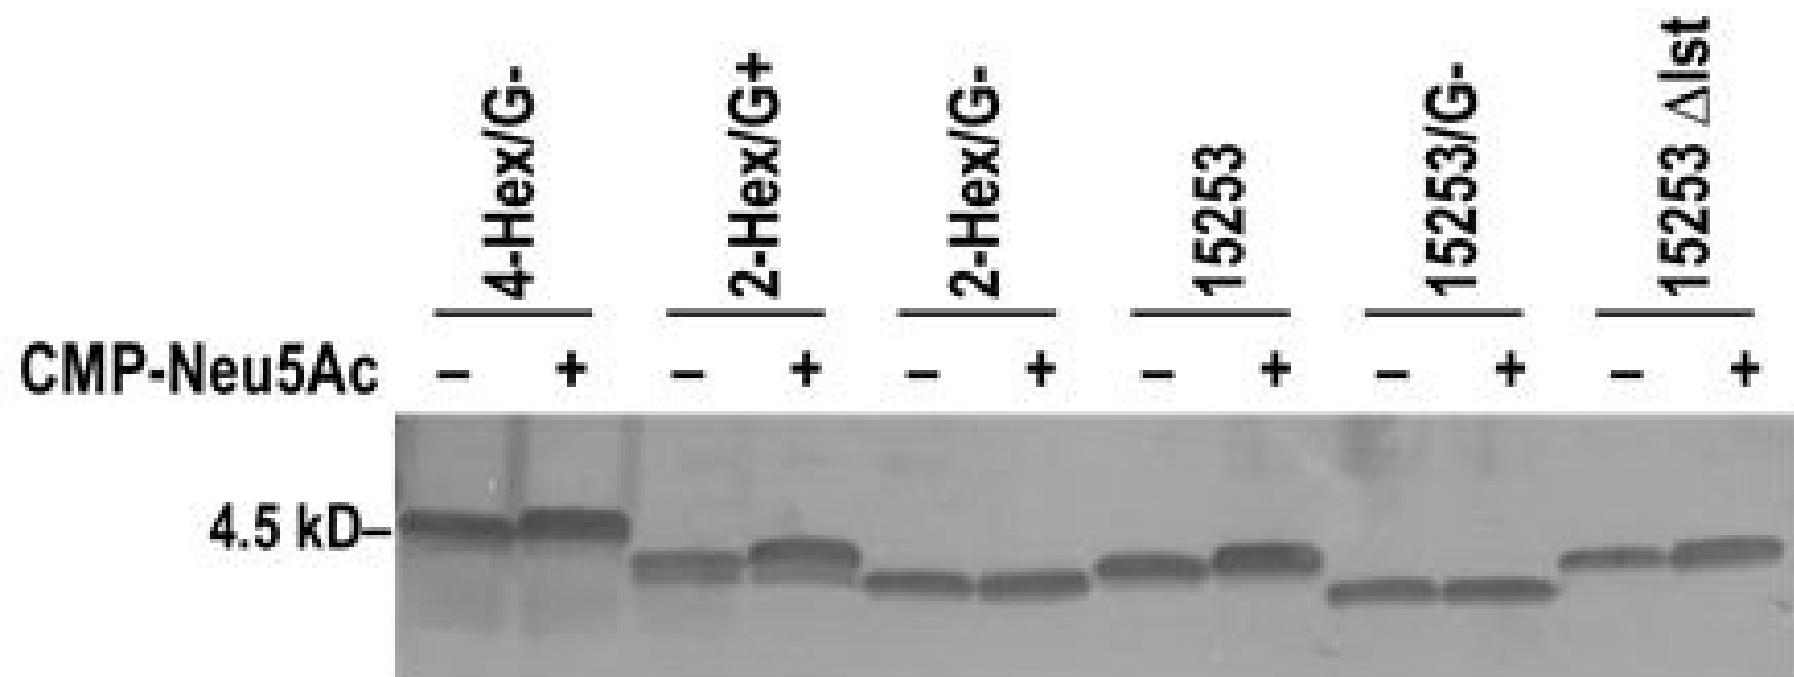

Fig. 3

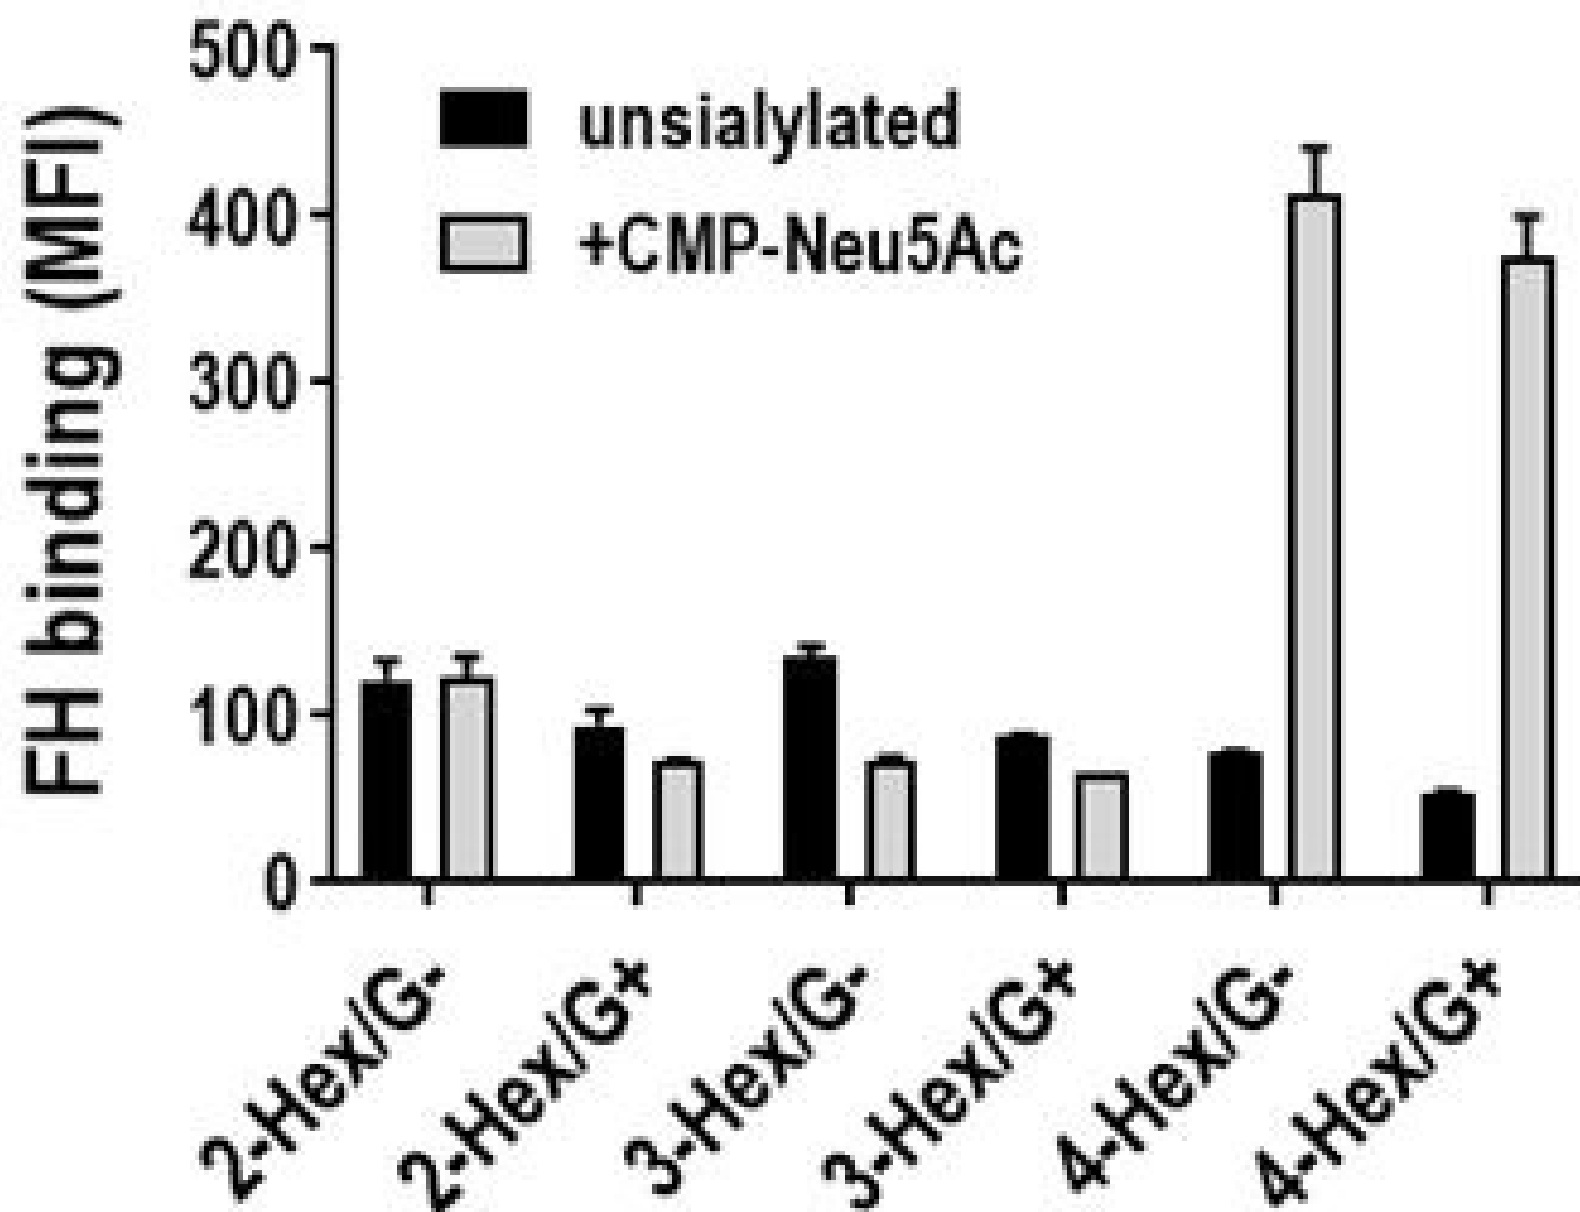

**Fig. 4**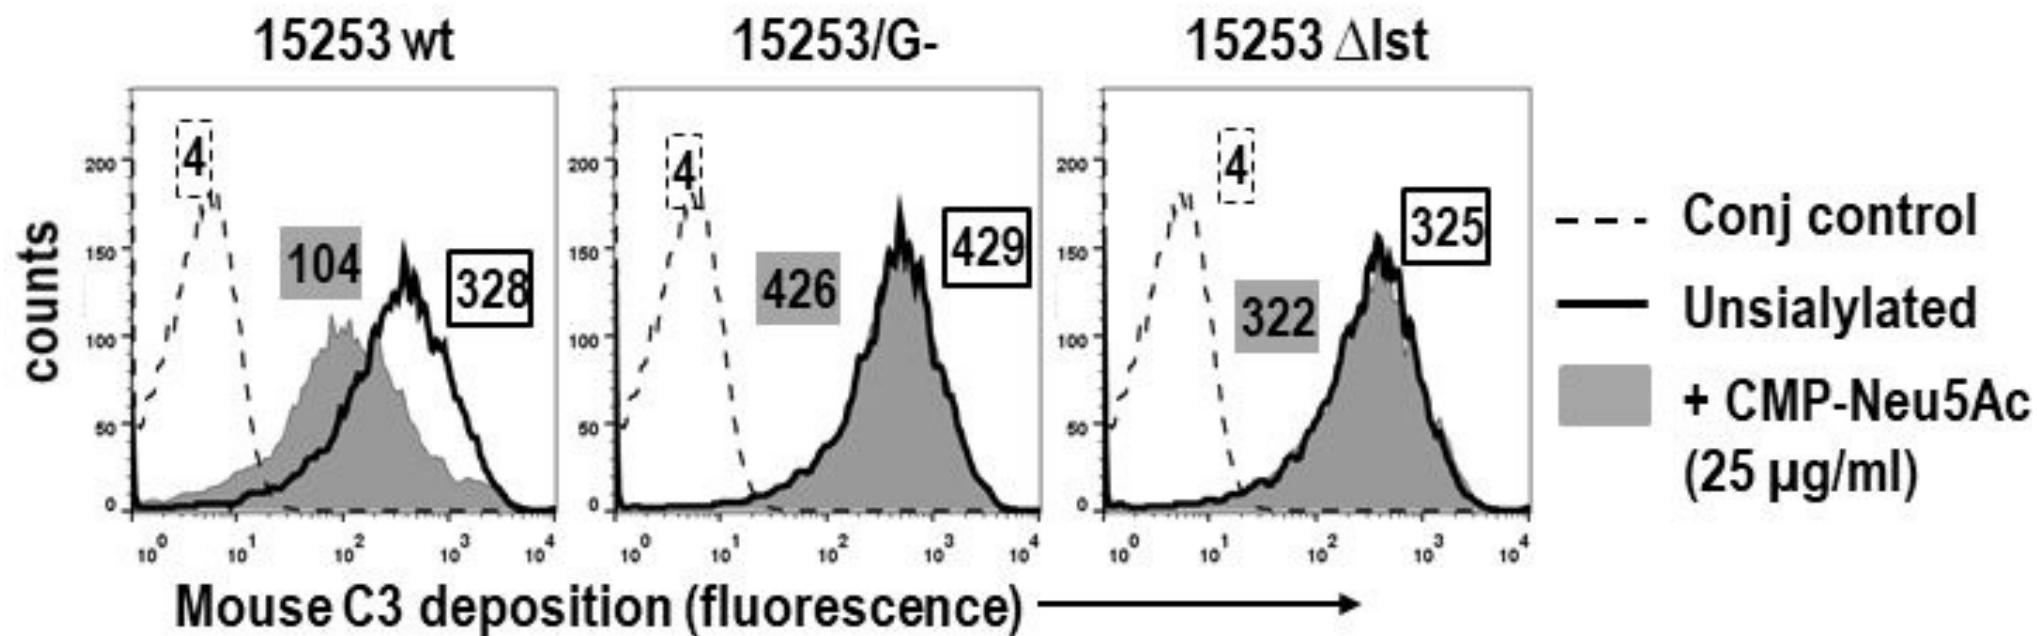

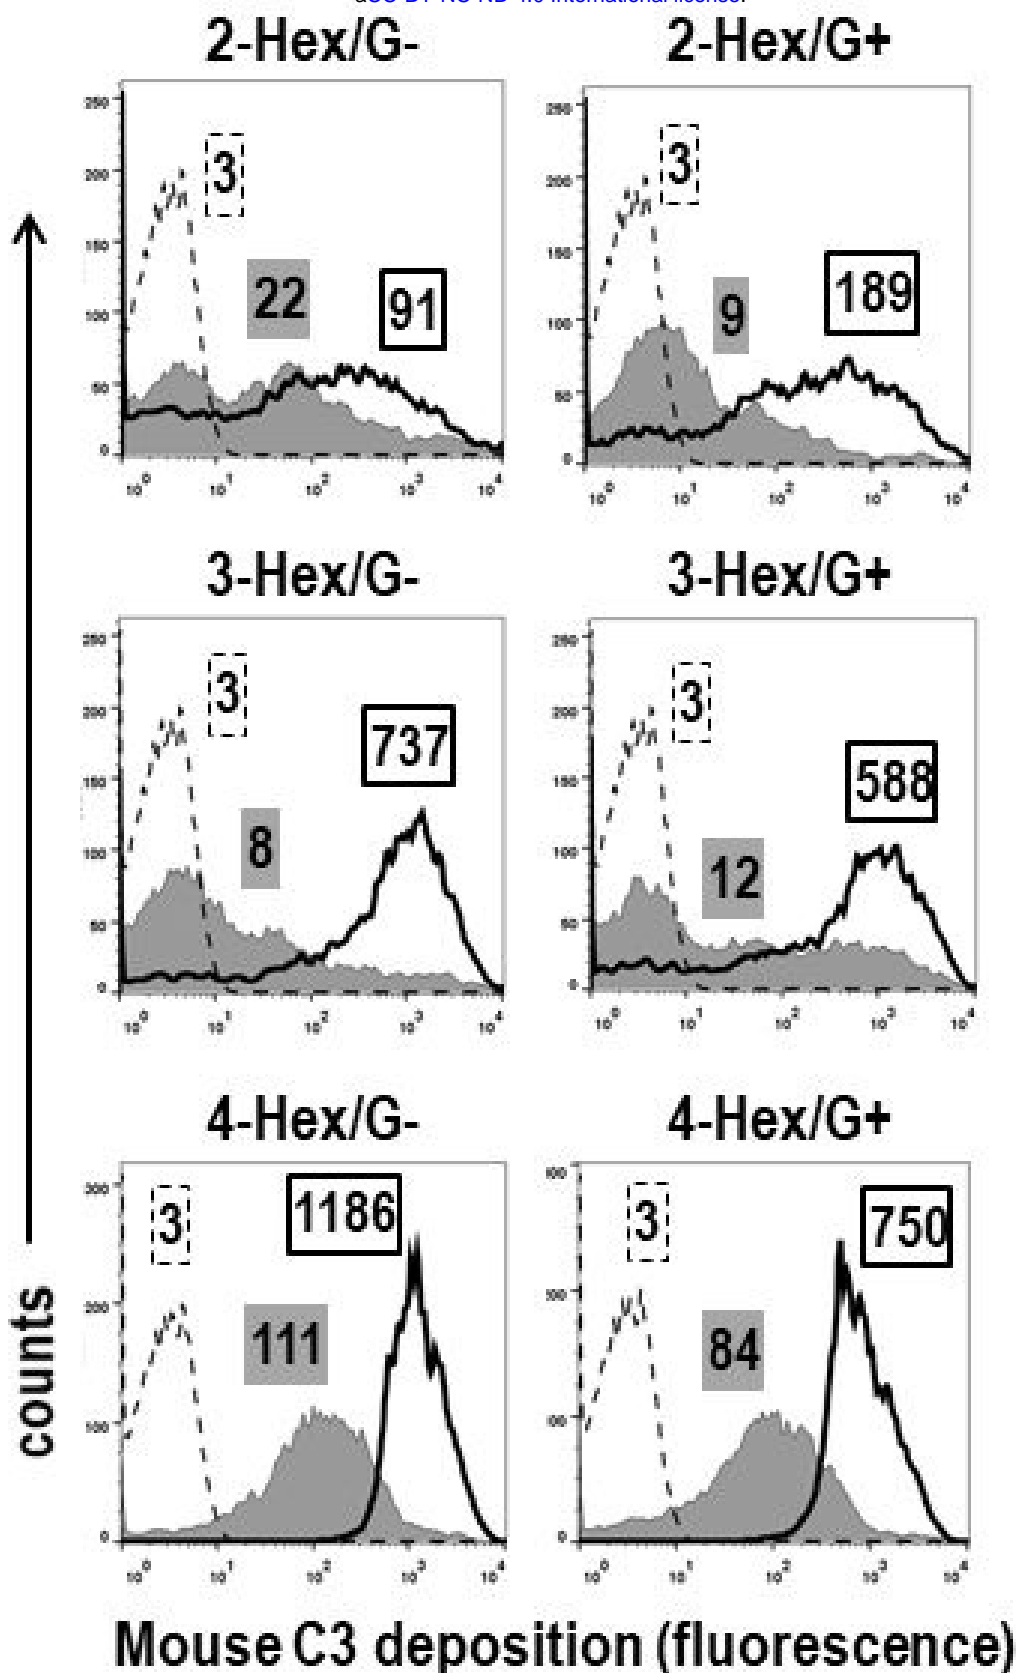

--- Conj control

— Unsialylated

■ + CMP-Neu5Ac (25 µg/ml)



**Fig. 6**

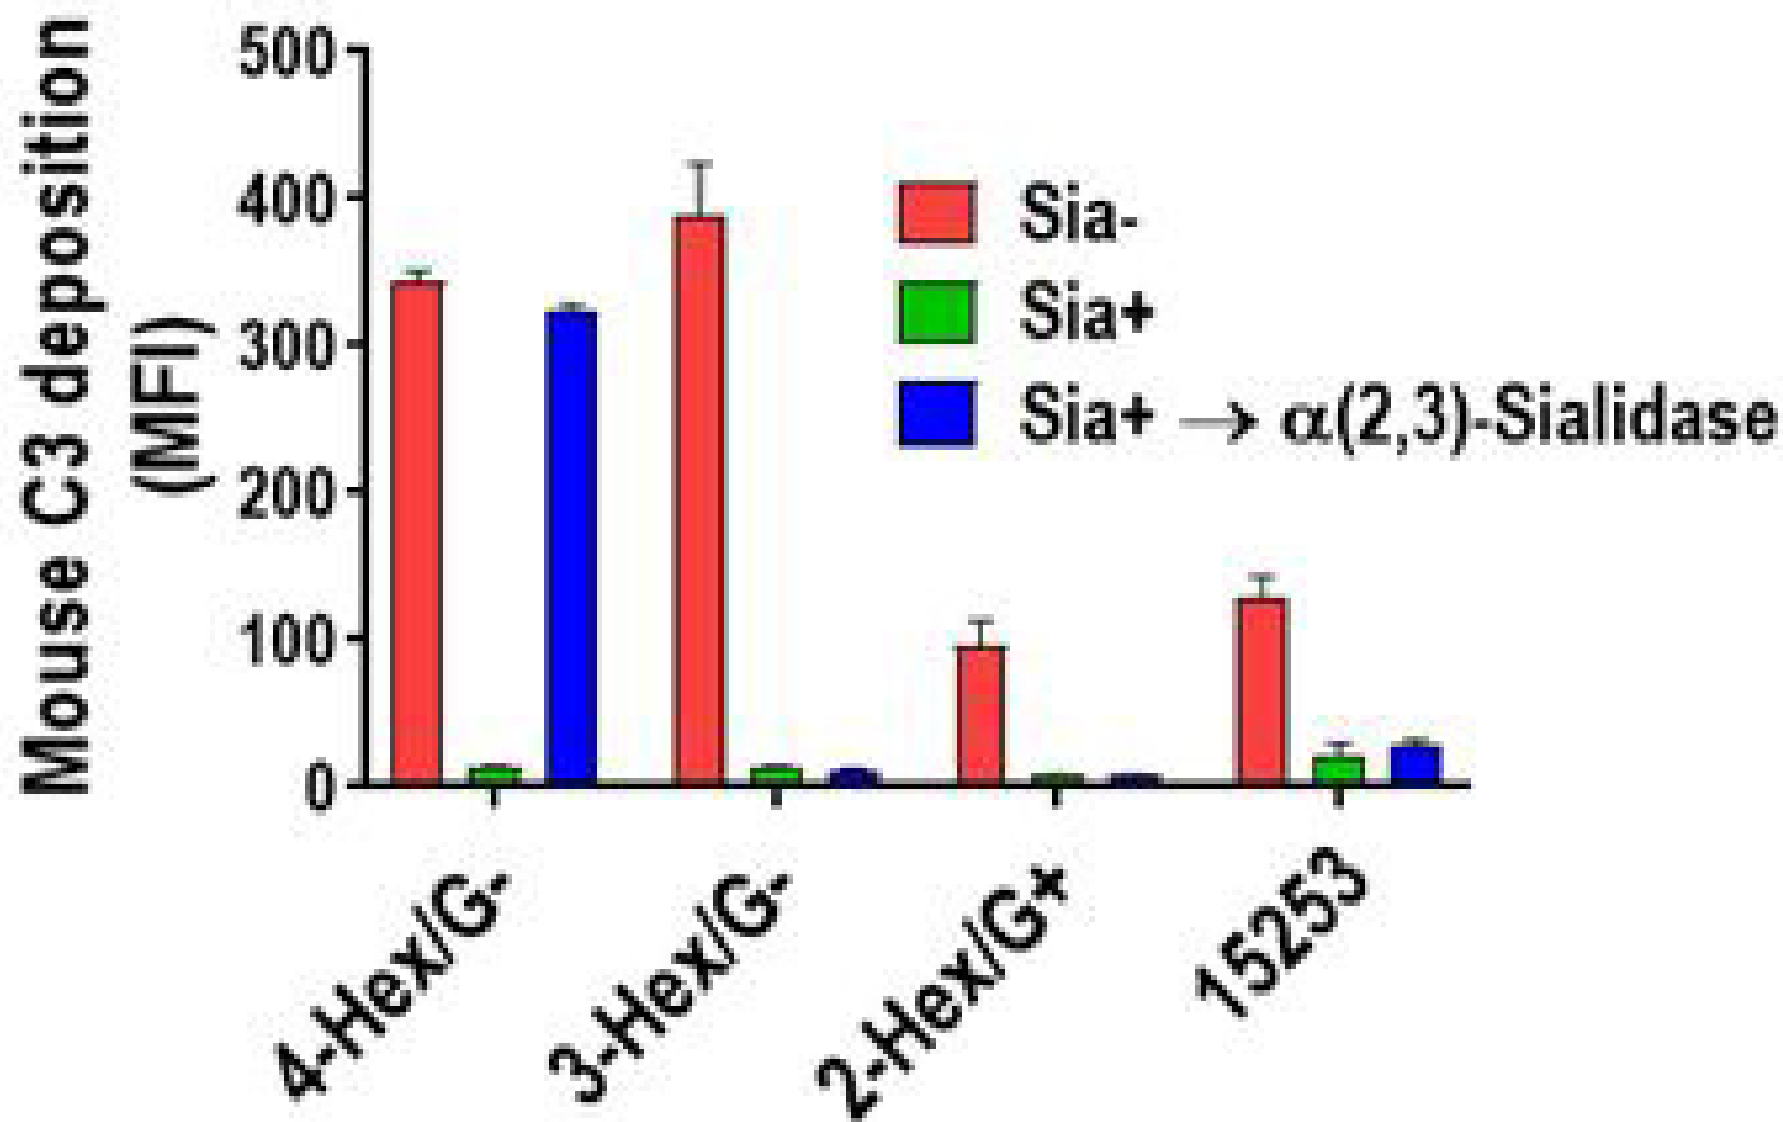

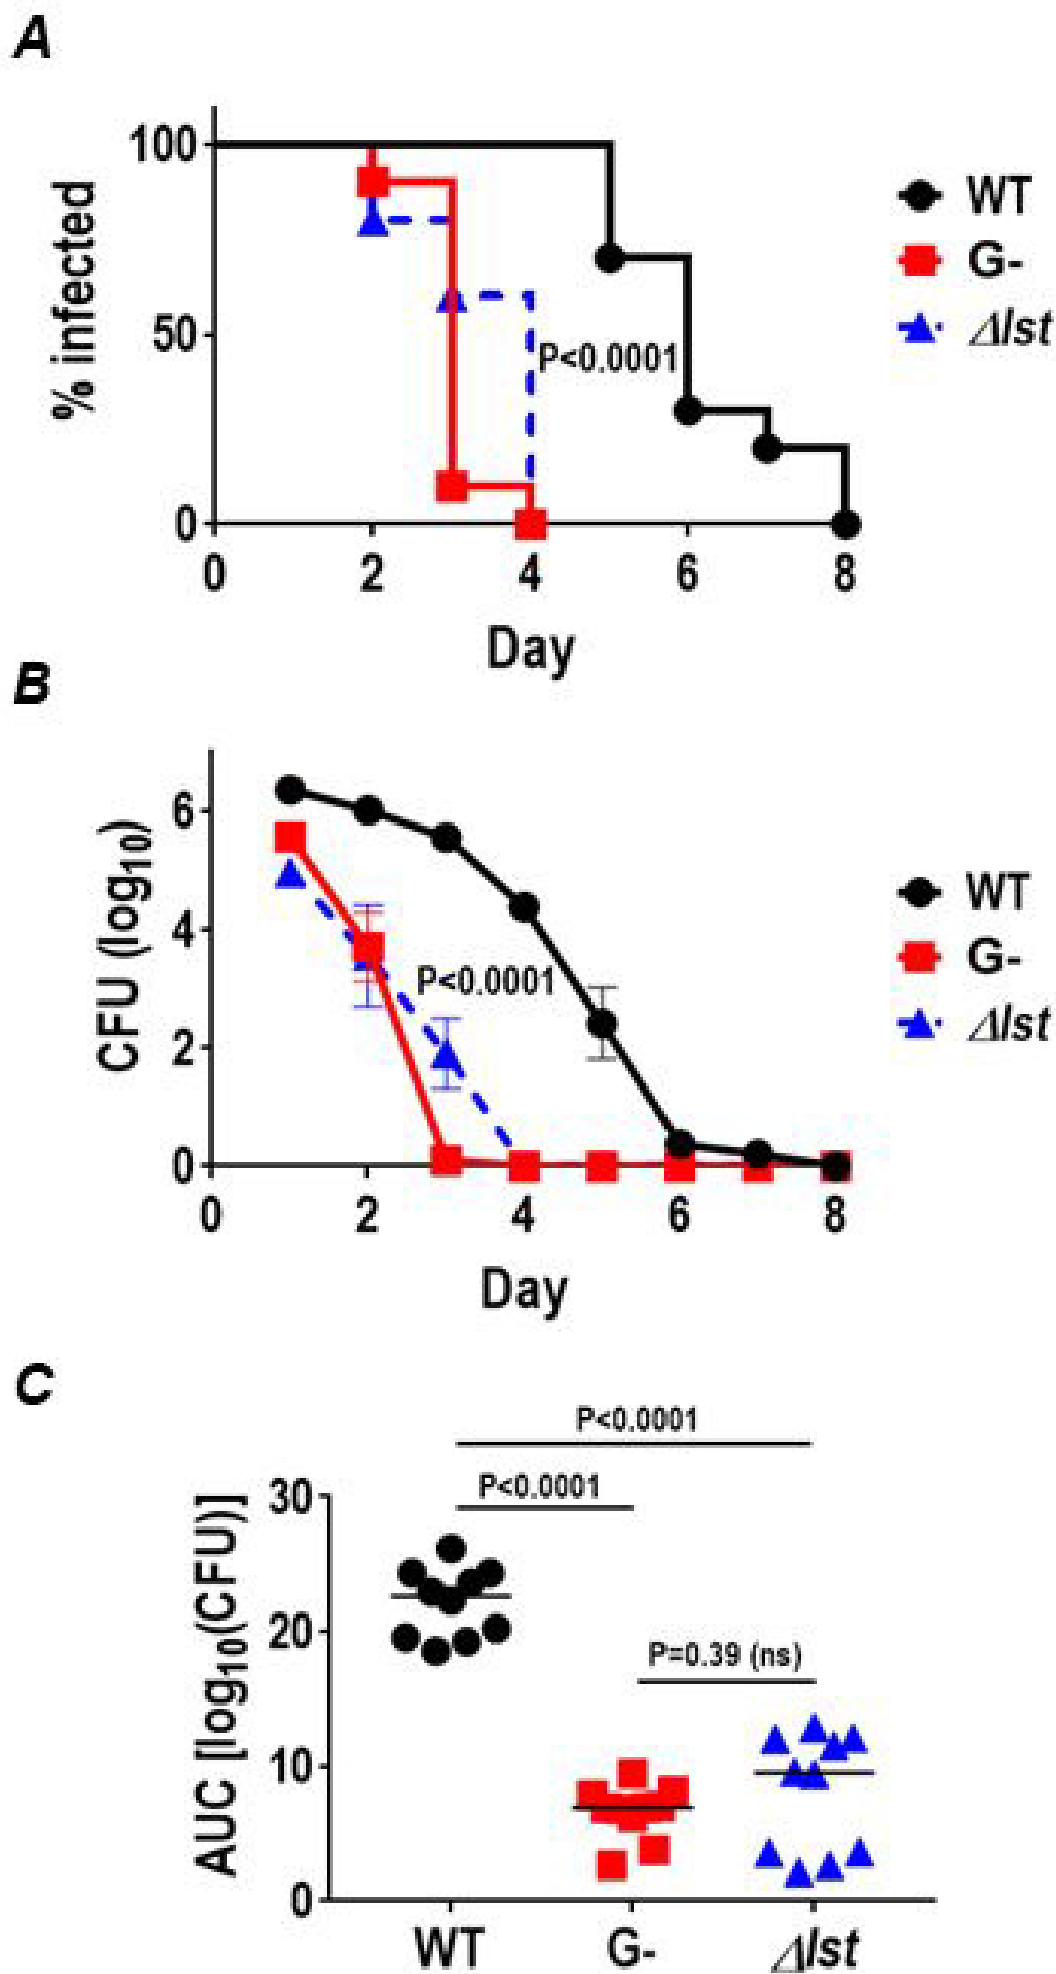

**A**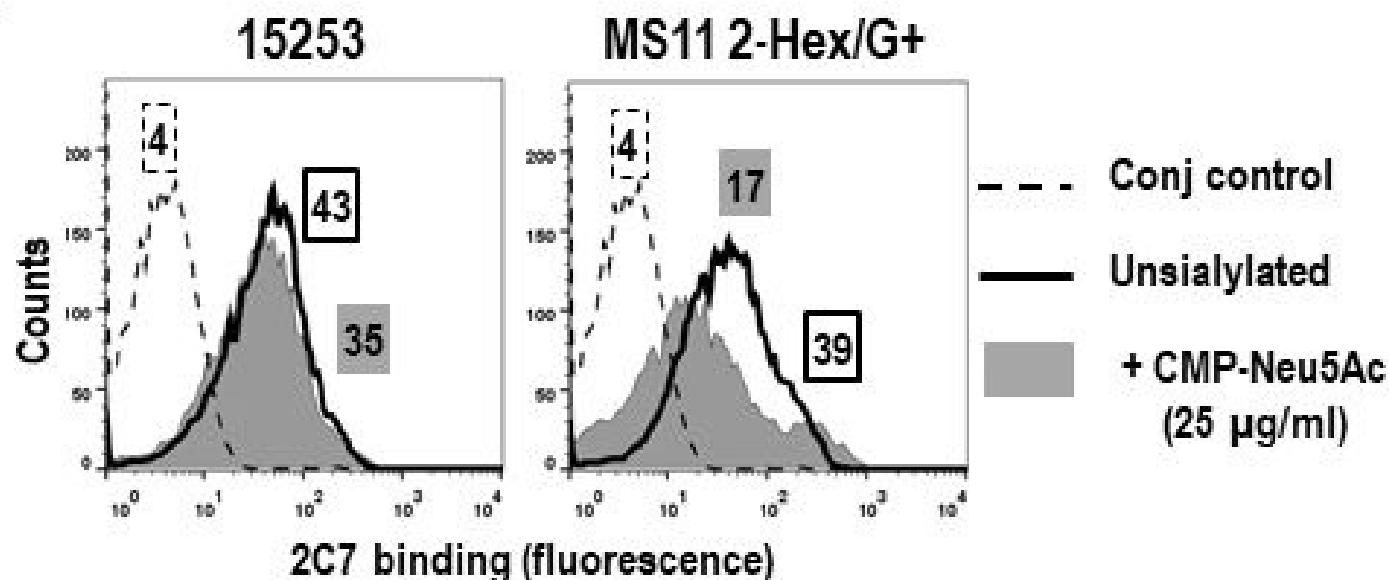**B**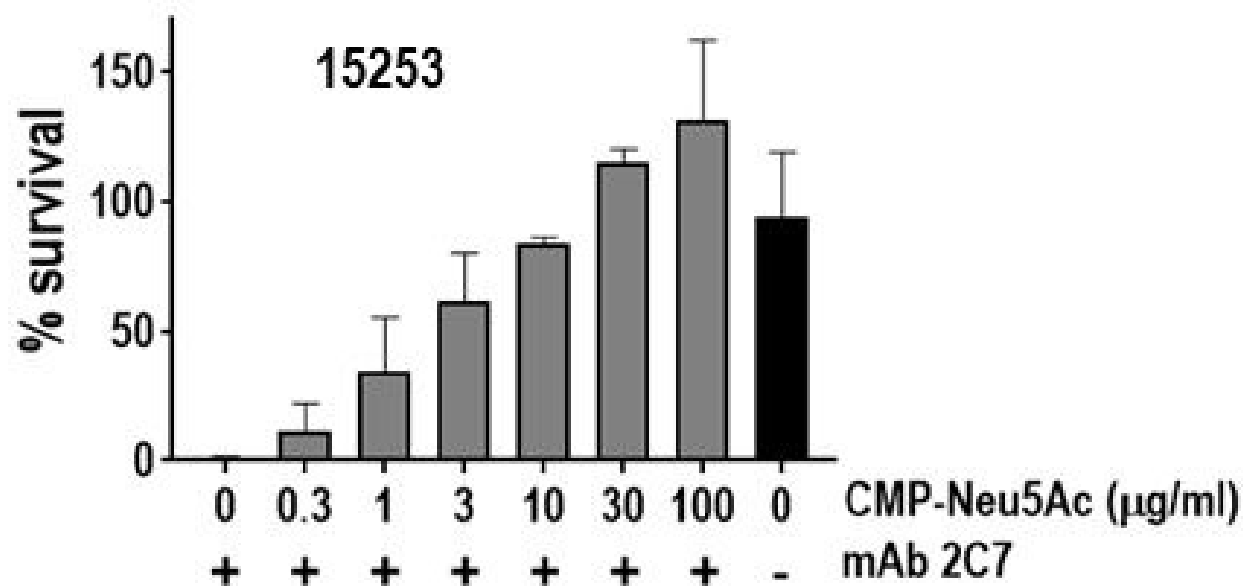

A

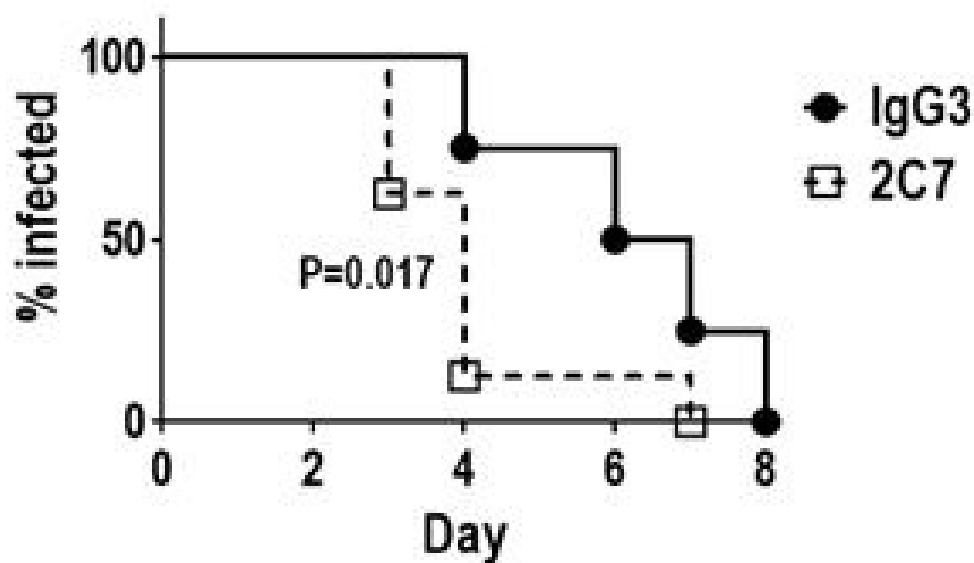

B

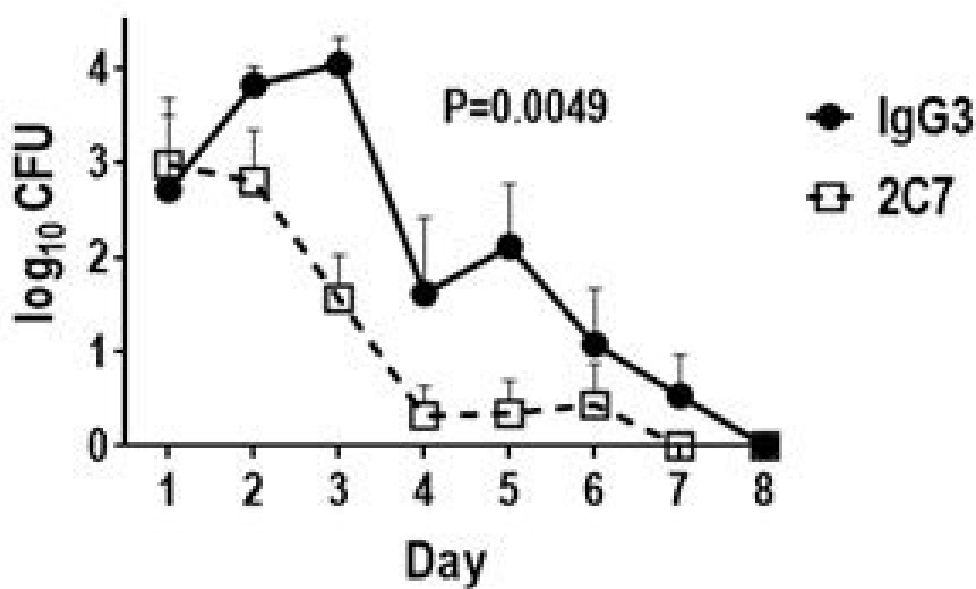

C

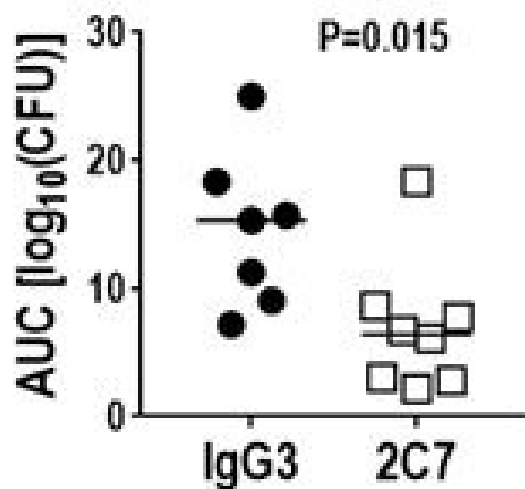

**A**

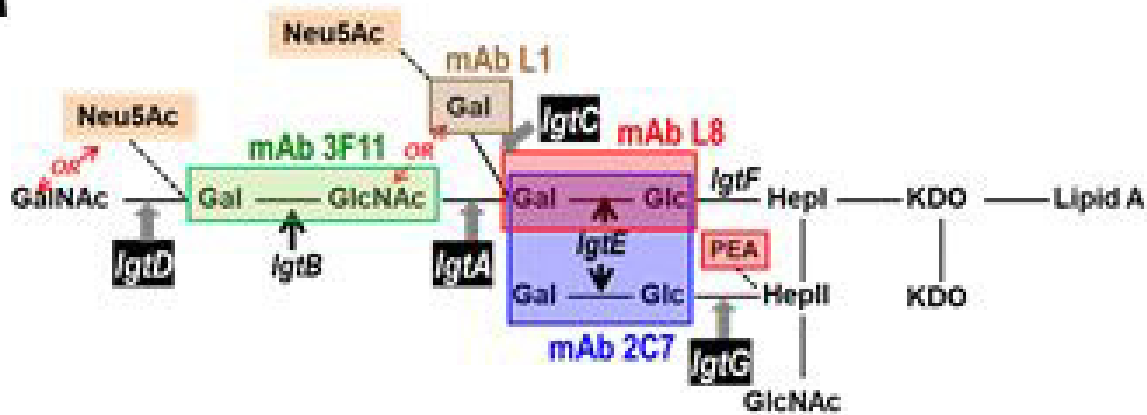

**B**

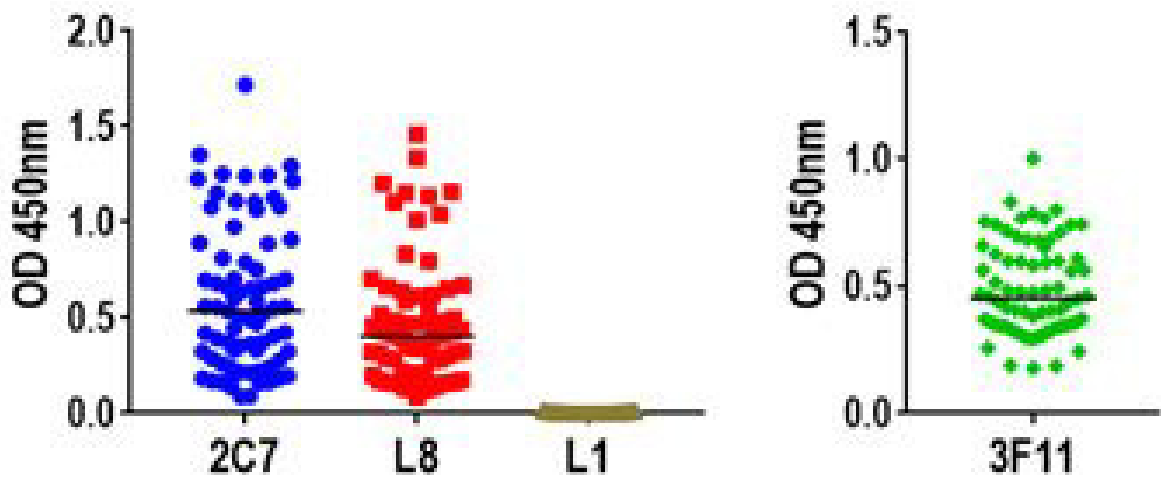

**C**

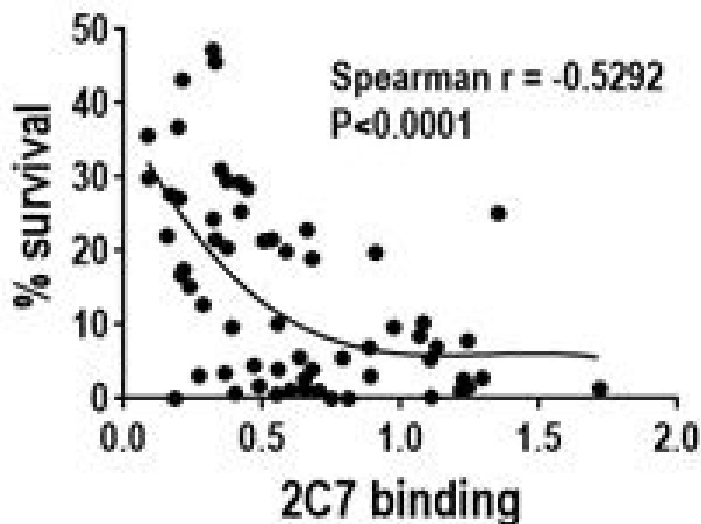

Source: https://www.biorxiv.org/content/10.1101/302968v1.full.pdf
